# Supplementary material
Source: PubMed Central journal article supplement (PMC3636156)

# Modulating water-exchange rates of lanthanide(III)-containing polyaminopolycarboxylate-type complexes using polyethylene glycol

Buddhima N. Siriwardena-Mahanama and Matthew J. Allen\*

*Contribution from the Department of Chemistry, Wayne State University, Detroit, MI 48202*

\*E-mail: mallen@chem.wayne.edu

---

| <b>Page</b> | <b>Contents</b>                                        |
|-------------|--------------------------------------------------------|
| S1          | Table of Contents                                      |
| S2–5        | General Experimental Procedures                        |
| S5–10       | Synthetic Procedures                                   |
| S11–13      | Water-Proton Relaxation Rate Data                      |
| S14–17      | Variable-Temperature $^{17}\text{O}$ NMR Data          |
| S18         | Luminescence-Decay Rate Data                           |
| S18         | Electron Paramagnetic Resonance Spectra                |
| S19–21      | Estimation of Rotational Correlation Time ( $\tau_R$ ) |
| S22         | Estimation of Relaxivity Based on $\tau_R$             |
| S23         | References                                             |
| S24–28      | High Performance Liquid Chromatograms                  |
| S29–34      | $^1\text{H}$ and $^{13}\text{C}$ NMR Spectra           |

---

## General Experimental Procedures

Commercially available chemicals were of reagent-grade purity and were used without further purification unless otherwise noted. Water was purified using a PURELAB Ultra Mk2 (ELGA) water purification system. Flash chromatography was carried out with silica gel 60, 230–400 mesh (EMD chemicals).<sup>1</sup> Thin-layer chromatography was performed on ASTM TLC plates with a silica gel 60 F<sub>254</sub> coating (250  $\mu\text{m}$  layer thickness). Visualization of TLC was carried out with a UV lamp followed by staining with potassium permanganate (2 g  $\text{KMnO}_4$ , 20 g  $\text{K}_2\text{CO}_3$ , 5 mL 5% w/v aqueous NaOH, and 300 mL  $\text{H}_2\text{O}$ ). Spectra/Por Biotech cellulose ester dialysis membranes of 100–500 and 500–1000 Da molecular weight cut off (MWCO) were used for dialysis. Freeze drying was carried out using a LABCONCO FreeZone 2.5 freeze dryer. Resin reactions were performed in Poly-Prep chromatography columns on a Barnstead/Thermolyne LABQUAKE rotator. Centrifugation was carried out using a Fisher Scientific Centrifuge centrifuge 225. High-performance liquid chromatography (HPLC) was carried out on a Shimadzu HPLC system equipped with fluorescence ( $\lambda_{\text{ex}} = 273$ ,  $\lambda_{\text{em}} = 622$  and  $\lambda_{\text{ex}} = 396$ ,  $\lambda_{\text{em}} = 593$  nm, for  $\text{Gd}^{\text{III}}$  and  $\text{Eu}^{\text{III}}$  complexes, respectively), photodiode array (traces at 210 nm included in the SI), and refractive index detectors and a C4 column (RESTEK Ultra C4, 5.0  $\mu\text{m} \times 250$  mm). Aqueous size-exclusion chromatography (SEC) was performed on the same HPLC system using three aquagel-OH columns in series (VARIAN PLaquagel-OH-mixed, 8  $\mu\text{m} \times 300$  mm). A binary gradient method (pump A:  $\text{H}_2\text{O}$ , pump B:  $\text{CH}_3\text{CN}$ ; 95–5% B over 20 min; flow rate: 1 mL/min) was used with the C4 column, and an isocratic method (100%  $\text{H}_2\text{O}$ ; flow rate: 1 mL/min) was used with the aquagel-OH columns.

<sup>1</sup>H NMR spectra were acquired using a Varian Unity 400 (400 MHz) or a Varian-500S (500 MHz) spectrometer, and <sup>13</sup>C NMR spectra were acquired using a Varian Unity 400 (101

MHz) or a Varian-500S (125 MHz) spectrometer. Chemical shifts (ppm) for  $^1\text{H}$  NMR spectra are reported relative to residual  $\text{CHCl}_3$  in  $\text{CDCl}_3$  (7.27 ppm) or  $\text{CH}_3\text{OH}$  in  $\text{CD}_3\text{OD}$  (3.30 ppm). Multiplicities are reported as “s” = singlet, “m” = multiplet, and “brs” = broad singlet. The elements responsible for particular shifts are noted with italicized font. Chemical shifts for  $^{13}\text{C}$  NMR spectra are reported relative to  $\text{CDCl}_3$  (77.23 ppm) in  $\text{CDCl}_3$  or  $\text{CD}_3\text{CN}$  (118.26 ppm) as an internal standard in  $\text{D}_2\text{O}$ . High-resolution electrospray ionization mass spectra (HRESIMS) were obtained on an electrospray time-of-flight high-resolution Waters Micromass LCT Premier XE mass spectrometer. Matrix-assisted laser desorption ionization (MALDI) mass spectrometry was performed on a Waters SYNAPT G2 mass spectrometer (Manchester, UK) equipped with a commercial MALDI source and a Nd:YAG laser (355 nm, 200 Hz) or a Bruker Ultraflex MALDI-TOF mass spectrometer.  $\alpha$ -Cyano-4-hydroxycinnamic acid (5 mg in 50:50  $\text{CH}_3\text{CN}/\text{H}_2\text{O}$  with 0.1% formic acid) was used as the matrix. Prior to plating, samples ( $\sim 1$   $\mu\text{g}/\text{mL}$  in water with 0.1% formic acid or  $\sim 1$   $\text{mg}/\text{mL}$  in water) and matrix were mixed in 1:1 or 1:100 v/v ratios. *N*-(*tert*-Butoxycarbonyl)-*N'*-aminoacetylchloride, **4**, was synthesized according to a published procedure.<sup>2</sup>

Inductively coupled plasma optical emission spectroscopy (ICP-OES) measurements were performed on a HORIBA Jobin Yvon *ULTIMA* spectrometer or by Columbia Analytical Services Inc., Tucson, Arizona, USA. Samples measured with the *ULTIMA* spectrometer were diluted with nitric acid (2% v/v, aqueous), and standards were prepared by serial dilution of Gd, Eu, and Y standards (High-Purity Standards).

Water proton relaxation rate data were obtained using a Bruker mq 60 NMR Analyzer (1.4 T) at 37 °C for  $\text{Gd}^{\text{III}}$ -containing conjugates **1a–d** in phosphate-buffered saline (pH 7.4). The relaxivities of  $\text{Gd}^{\text{III}}$ -containing conjugates were obtained from the slopes of the linear plots of

$1/T_1$  versus  $Gd^{III}$  concentration. Measurements were repeated three times with independently prepared solutions for each  $Gd^{III}$ -containing conjugate. The  $Gd^{III}$  concentration was verified by ICP-OES.

Variable-temperature  $^{17}O$  NMR measurements of  $Gd^{III}$ -containing conjugates **1a** (6 mM), **1b** (6 mM), **1c** (4 mM), and **1d** (17 mM) and their diamagnetic  $Y^{III}$  analogues (**3a-d**) in  $H_2O$  were carried out on a Varian-500S spectrometer. Enrichment in  $^{17}O$  (1%) was achieved using  $^{17}O$ -enriched water (10%  $H_2^{17}O$ , Cambridge Isotope Laboratories, Inc.). Line widths at half height were measured at 20 (or 25), 30, 40, 50, 60, and 70 °C.  $A/\hbar$  and  $\Delta E$  were fixed to  $-3.8 \times 10^{-6}$  rad/s and  $2.5 \times 10^{-11}$  J/mol, respectively, for  $Gd^{III}$ -containing conjugates, **1a-d**. The water-coordination number,  $q$ , was set to the value obtained from luminescence-decay measurements for  $Eu^{III}$ -containing conjugates **2a-d**. The least-squares fits of the  $^{17}O$  NMR relaxation data were calculated using origin software (8.0951 B951) following a previously published procedure<sup>3</sup> to obtain the water-exchange rates of  $Gd^{III}$ -containing conjugates, **1a-d**.  $Gd^{III}$  and  $Y^{III}$  concentrations were verified by ICP-OES.

Luminescence-decay measurements of  $Eu^{III}$ -containing conjugates **2a-d**, in  $H_2O$  and  $D_2O$  were acquired using a HORIBA Jobin Yvon Fluoromax-4 spectrofluorometer in decay by delay scan mode using the phosphorescence lifetime setting. Excitation and emission wavelengths of 393 and 596 nm were used, respectively, while the other parameters were kept constant: excitation and emission slit widths (5 nm), flash count (100), initial delay (0.01 ms), maximum delay (2 ms for solutions in  $H_2O$  and 8 ms for solutions in  $D_2O$ ), and delay increment (0.01 ms). The number of coordinated water molecules,  $q$ , was determined using the method developed by Horrocks and coworkers.<sup>4</sup>

Electron paramagnetic resonance (EPR) measurements of **1a–d** in water were performed on a Bruker EMX X-band spectrometer. From the EPR spectra, the electronic Landé  $g$  factors,  $g_L$ , peak-to-peak line widths,  $\Delta H_{pp}$ , and transverse electronic relaxation rates,  $1/T_{2e}$ , were obtained according to a previously reported method.<sup>5</sup>

## Synthetic Procedures

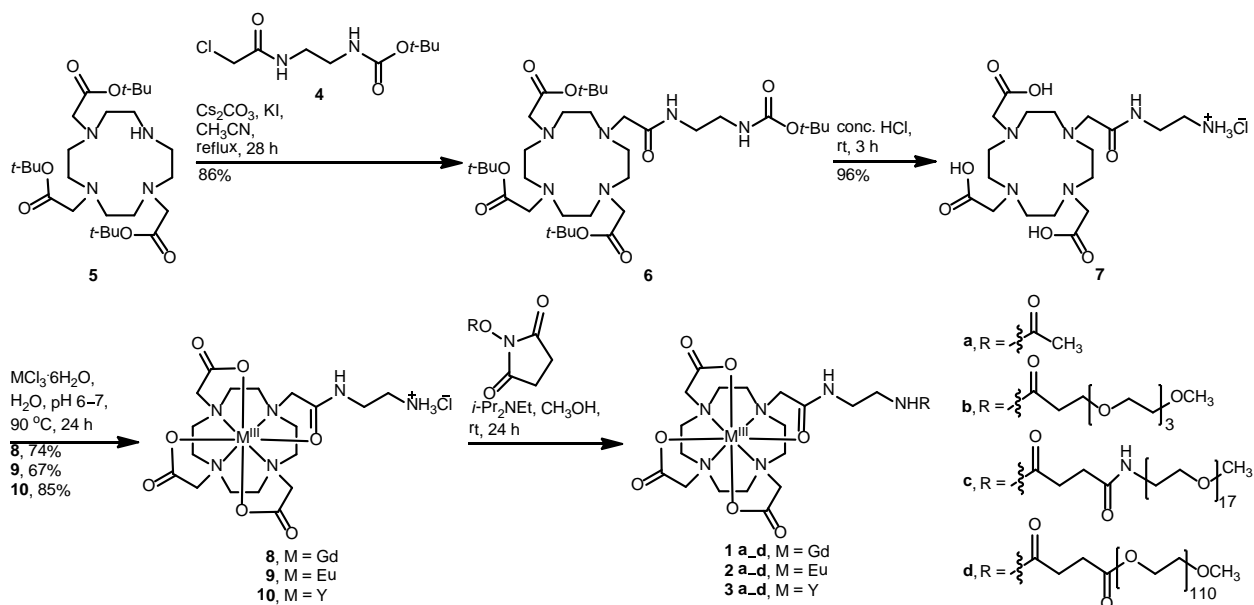

**1,4,7-Tris(*tert*-butyloxycarbonylmethyl)-1,4,7,10-tetraazacyclododecane (**5**):** This procedure is based on a previous report with modifications as noted in the following text.<sup>6</sup> To a mixture of cyclen (1.00 g, 5.80 mmol, 1 equiv) and  $\text{NaHCO}_3$  (1.61 g, 19.2 mmol, 3.3 equiv) in anhydrous  $\text{CH}_3\text{CN}$  (15 mL) at 0 °C under Ar was added a solution of *tert*-butyl bromoacetate (2.90 mL, 19.4 mmol, 3.3 equiv) in anhydrous  $\text{CH}_3\text{CN}$  (20 mL) over a period of 18 h (instead of 30 min as described in the previous report). The reaction mixture was allowed to warm to ambient temperature during the addition of *tert*-butyl bromoacetate (instead of after the addition as previously reported). The reaction mixture was stirred under Ar for 48 h after the addition of

*tert*-butyl bromoacetate. The reaction mixture was filtered through celite, and the filtrate was reduced to dryness under reduced pressure to yield a pale yellow solid that was purified using silica gel column chromatography (9:1 CHCl<sub>3</sub>/CH<sub>3</sub>OH) (not described in the previous report). Fractions with *R<sub>f</sub>* values (9:1 CHCl<sub>3</sub>/CH<sub>3</sub>OH) between 0.39 and 0.63 were combined, and the solvent was removed under reduced pressure. The resulting solid was recrystallized from hot toluene, dissolved in saturated NaHCO<sub>3</sub> (50 mL), extracted with CHCl<sub>3</sub> (3 × 50 mL), and dried over anhydrous MgSO<sub>4</sub>. Solvent was removed under reduced pressure to obtain 1.46 g (49%) of **5** as an off-white solid. <sup>1</sup>H NMR (500 MHz, CDCl<sub>3</sub>, δ): 1.34–1.52 (m, CH<sub>3</sub>, 27H), 2.70–2.91 (m, CH<sub>2</sub>CH<sub>2</sub>, 12H), 3.00 (brs, CH<sub>2</sub>CH<sub>2</sub>, 4H), 3.30 (s, CH<sub>2</sub>C=O, 2H), 3.35 (s, CH<sub>2</sub>C=O, 4H); <sup>13</sup>C NMR (125 MHz, CDCl<sub>3</sub>, δ): 28.20 (CH<sub>3</sub>), 28.24 (CH<sub>3</sub>), 47.8 (CH<sub>2</sub>CH<sub>2</sub>), 50.4 (CH<sub>2</sub>C=O), 51.3 (CH<sub>2</sub>CH<sub>2</sub>), 51.7 (CH<sub>2</sub>CH<sub>2</sub>), 58.1 (CH<sub>2</sub>C=O), 81.5 (C(CH<sub>3</sub>)<sub>3</sub>), 81.6 (C(CH<sub>3</sub>)<sub>3</sub>), 170.4, 171.1; *R<sub>f</sub>* = 0.47 (9:1 CH<sub>3</sub>Cl/CH<sub>3</sub>OH); HRESIMS (*m/z*): [M + H]<sup>+</sup> calcd for C<sub>26</sub>H<sub>51</sub>N<sub>4</sub>O<sub>6</sub>, 515.3809; found 515.3817.

**1,4,7-Tris(*tert*-butyloxycarbonylmethyl)-10-(*N*-(2-*tert*-butoxycarbonylaminoethyl)**

**acetamide-1,4,7,10-tetraazacyclododecane (6):** To a mixture of **5** (0.394 g, 0.765 mmol, 1 equiv), Cs<sub>2</sub>CO<sub>3</sub> (0.584 g, 1.79 mmol, 2.3 equiv), and KI (0.278 g, 1.67 mmol, 2.2 equiv) in anhydrous CH<sub>3</sub>CN (16 mL) was added a solution of **4** (0.219 g, 0.925 mmol, 1.2 equiv) in anhydrous CH<sub>3</sub>CN (16 mL) under Ar. The reaction mixture was heated at reflux under Ar for 28 h. The reaction mixture was cooled to ambient temperature and filtered through celite, and the solvent was removed under reduced pressure. The resulting residue was dissolved in CHCl<sub>3</sub> (40 mL) and washed sequentially with H<sub>2</sub>O (40 mL) and saturated aqueous KCl (3 × 40 mL). The organic layer was dried over anhydrous K<sub>2</sub>CO<sub>3</sub> and concentrated under reduced pressure to obtain 0.470 g (86%) of **6** as a light brown solid. <sup>1</sup>H NMR (400 MHz, CDCl<sub>3</sub>, δ): 1.32–1.52 (m,

$\text{CH}_3$ , 36H), 2.51 (brs,  $\text{CH}_2\text{CH}_2$ , 4H), 2.68 (brs,  $\text{CH}_2\text{CH}_2$ , 4H), 2.89 (brs,  $\text{CH}_2\text{C}=\text{O}$ , 6H), 3.07 (s,  $\text{CH}_2\text{C}=\text{O}$ , 2H), 3.16–3.58 (m,  $\text{CH}_2\text{CH}_2$ , 12H), 5.99 (brs, NH, 1H), 8.79 (brs, NH, 1H);  $^{13}\text{C}$  NMR (101 MHz,  $\text{CDCl}_3$ ,  $\delta$ ): 27.9 ( $\text{CH}_3$ ), 28.0 ( $\text{CH}_3$ ), 28.2 ( $\text{CH}_3$ ), 28.6 ( $\text{CH}_3$ ), 39.6 ( $\text{CH}_2\text{CH}_2$ ), 41.1 ( $\text{CH}_2\text{CH}_2$ ), 51.7 ( $\text{CH}_2\text{CH}_2$ ), 52.3 ( $\text{CH}_2\text{C}=\text{O}$ ), 53.7 ( $\text{CH}_2\text{C}=\text{O}$ ), 55.1 ( $\text{CH}_2\text{CH}_2$ ), 56.2 ( $\text{CH}_2\text{CH}_2$ ), 57.1 ( $\text{CH}_2\text{CH}_2$ ), 57.8 ( $\text{CH}_2\text{C}=\text{O}$ ), 79.1 ( $\text{C}(\text{CH}_3)_3$ ), 80.9 ( $\text{C}(\text{CH}_3)_3$ ), 81.0 ( $\text{C}(\text{CH}_3)_3$ ), 81.9 ( $\text{C}(\text{CH}_3)_3$ ), 155.9, 156.5, 170.6, 171.8, 172.7; HRESIMS ( $m/z$ ):  $[\text{M} + \text{H}]^+$  calcd for  $\text{C}_{35}\text{H}_{67}\text{N}_6\text{O}_9$ , 715.4970; found 715.4976.

**1,4,7-Tris(carbonylmethyl)-10-(aminoethyl-*N'*)acetyl)-1,4,7,10-tetraazacyclododecane (7):**

To *tert*-butylester **6** (0.248 g, 0.347 mmol) was added concentrated HCl (25 mL), and the resulting mixture was stirred at ambient temperature for 3 h. The reaction mixture was concentrated under reduced pressure, and the resulting residue was dissolved in  $\text{H}_2\text{O}$  and freeze dried to obtain 0.161 g (96%) of **7** as a yellow–brown solid.  $^1\text{H}$  NMR (400 MHz,  $\text{CD}_3\text{OD}$ ,  $\delta$  at 55 °C): 3.02–3.24 (m,  $\text{CH}_2\text{CH}_2$ , 10H), 3.36–3.58 (m,  $\text{CH}_2\text{CH}_2$ , and  $\text{CH}_2\text{C}=\text{O}$ , 12H), 3.70 (s,  $\text{CH}_2\text{C}=\text{O}$ , 2H), 3.94 (s,  $\text{CH}_2\text{C}=\text{O}$ , 4H);  $^{13}\text{C}$  NMR (125 MHz,  $\text{D}_2\text{O}$ ,  $\delta$  at 65 °C): 35.4 ( $\text{CH}_2\text{CH}_2$ ), 38.3 ( $\text{CH}_2\text{CH}_2$ ), 48.2 ( $\text{CH}_2\text{CH}_2$ ), 48.3 ( $\text{CH}_2\text{CH}_2$ ), 48.9 ( $\text{CH}_2\text{CH}_2$ ), 49.0 ( $\text{CH}_2\text{CH}_2$ ), 52.1 ( $\text{CH}_2\text{C}=\text{O}$ ), 52.3 ( $\text{CH}_2\text{C}=\text{O}$ ), 52.9 ( $\text{CH}_2\text{C}=\text{O}$ ), 169.0, 169.3, 170.0; HRESIMS ( $m/z$ ):  $[\text{M} + \text{H}]^+$  calcd for  $\text{C}_{18}\text{H}_{35}\text{N}_6\text{O}_7$ , 447.2567; found 447.2562.

**General procedure for the synthesis of  $\text{Ln}^{\text{III}}$  (8 and 9) and  $\text{Y}^{\text{III}}$  complexes (10):**

Ligand **7** (0.100 g, 0.207 mmol, 1 equiv) was dissolved in  $\text{H}_2\text{O}$  (20 mL) and the pH of the solution was adjusted to between 6 and 7 using 1 M  $\text{NH}_4\text{OH}$ . To the resulting solution was added  $\text{MCl}_3 \cdot 6\text{H}_2\text{O}$  (0.311 mmol, 1.5 equiv), and the pH of the solution was adjusted to between 6 and 7 using 1 M  $\text{NH}_4\text{OH}$ . The reaction mixture was heated at 90 °C for 24 h and then cooled to ambient temperature. The pH of the solution was increased to 11 by adding 1 M  $\text{NH}_4\text{OH}$

followed by centrifugation, and the supernatant was filtered through a 0.2  $\mu\text{m}$  hydrophilic syringe filter (Millipore, IC MILLEX-LG). The filtrate was dialyzed in a 500 Da molecular weight cut off (MWCO) dialysis membrane against  $\text{H}_2\text{O}$  (4 L). The dialysis reservoir was changed at 2–4, 6–8, and 10–14 h. After the last change, dialysis was continued for 7 h. Contents within the dialysis membrane were freeze dried to obtain 0.0948 g (74%) of **8**, 0.0851 g (67%) of **9**, or 0.0981 g (85%) of **10** as off-white solids.

**Gd<sup>III</sup> complex (8):** HRESIMS ( $m/z$ ):  $[\text{M} + \text{H}]^+$  calcd for  $\text{GdC}_{18}\text{H}_{32}\text{N}_6\text{O}_7$ , 599.1559; found 599.1579. SEC chromatogram is on page S24.

**Eu<sup>III</sup> complex (9):** HRESIMS ( $m/z$ ):  $[\text{M} + \text{H}]^+$  calcd for  $\text{EuC}_{18}\text{H}_{32}\text{N}_6\text{O}_7$ , 595.1531; found 595.1523. SEC chromatogram is on page S24.

**Y<sup>III</sup> complex (10):** HRESIMS ( $m/z$ ):  $[\text{M} + \text{H}]^+$  calcd for  $\text{YC}_{18}\text{H}_{32}\text{N}_6\text{O}_7$ , 533.1391; found 533.1396. SEC chromatogram is on page S24.

**General procedure for the synthesis of Ln<sup>III</sup> (1a–c and 2a–c) and Y<sup>III</sup> conjugates (3a–c):**

To a flask containing N-acetoxysuccinimide, **a**, or a succinimidyl ester derivative of PEG, **b** or **c**, (5 equiv), was added dropwise a mixture of Ln<sup>III</sup> complex **8** or **9**, or Y<sup>III</sup> complex **10**, (1 equiv), and diisopropylethylamine (5 equiv) in anhydrous  $\text{CH}_3\text{OH}$  (5 mL). The resulting mixture was allowed to stir at ambient temperature under Ar for 24 h. The resulting reaction mixture was added to aminomethylated polystyrene HL (100–200 mesh) resin (5 equiv, pre-swollen in ethanol for 0.5–1 h), and the resulting mixture was allowed to rotate for 15 to 18 h. The liquid portion of the reaction mixture was separated from the resin via filtration, and the resin was washed with ethanol ( $3 \times 7$  mL). The washings were combined with the liquid portion of the reaction mixture, and the solvents were removed under reduced pressure to obtain an oil that was dissolved in  $\text{H}_2\text{O}$  (10 mL) and washed with hexanes ( $4 \times 10$  mL). The  $\text{H}_2\text{O}$  layer was dialyzed in



either a 500 (**1a**, **2a**, **3a**, **1b**, **2b**, and **3b**) or 1000 Da (**1c**, **2c**, and **3c**) MWCO dialysis membrane against H<sub>2</sub>O (4 L). The dialysis reservoir was changed at 2–4, 6–8, and 10–14 h. After the last change, dialysis was continued for 7 h. Contents within the dialysis membrane were freeze dried and the resulting solids were washed with CH<sub>3</sub>CN (3 × 5 mL) to yield Ln<sup>III</sup> conjugates **1a–c** and **2a–c** and Y<sup>III</sup> conjugates **3a–c** as white solids. The purity of conjugates **1a–c**, **2a–c**, and **3a–c** was verified by HPLC, and the chromatograms are on pages S25–S27.

**Conjugate 1a:** 18.6 mg (46%), HRESIMS (*m/z*): [M + H]<sup>+</sup> calcd for GdC<sub>20</sub>H<sub>34</sub>N<sub>6</sub>O<sub>8</sub>, 641.1664; found 641.1640.

**Conjugate 1b:** 29.1 mg (43%), HRESIMS (*m/z*): [M + H]<sup>+</sup> calcd for GdC<sub>28</sub>H<sub>50</sub>N<sub>6</sub>O<sub>12</sub>, 817.2713; found 817.2708.

**Conjugate 1c:** 18.8 mg (51%), MALDI-MS: median peak [M + H]<sup>+</sup> calcd for GdC<sub>57</sub>H<sub>107</sub>N<sub>7</sub>O<sub>26</sub>, 1463.65; found 1463.19

**Conjugate 2a:** 18.9 mg (47%), HRESIMS (*m/z*): [M + H]<sup>+</sup> calcd for EuC<sub>20</sub>H<sub>34</sub>N<sub>6</sub>O<sub>8</sub>, 637.1637; found 637.1634.

**Conjugate 2b:** 22.5 mg (34%), HRESIMS (*m/z*): [M + H]<sup>+</sup> calcd for EuC<sub>28</sub>H<sub>50</sub>N<sub>6</sub>O<sub>12</sub>, 813.2685; found 813.2682.

**Conjugate 2c:** 12.87 mg (49%), MALDI-MS: median peak [M + H]<sup>+</sup> calcd for EuC<sub>57</sub>H<sub>107</sub>N<sub>7</sub>O<sub>26</sub>, 1458.65; found 1458.19

**Conjugate 3a:** 16.0 mg (48%), HRESIMS (*m/z*): [M + H]<sup>+</sup> calcd for YC<sub>20</sub>H<sub>34</sub>N<sub>6</sub>O<sub>8</sub>, 575.1497; found 575.1498.

**Conjugate 3b:** 27.2 mg (39%), HRESIMS (*m/z*): [M + H]<sup>+</sup> calcd for YC<sub>28</sub>H<sub>50</sub>N<sub>6</sub>O<sub>12</sub>, 751.2545; found 751.2543.

**Conjugate 3c:** 16.1 mg (49%), MALDI- MS: median peak  $[M + H]^+$  calcd for  $YC_{57}H_{107}N_7O_{26}$ , 1394.63; found 1394.19

**General procedure for the synthesis of  $Ln^{III}$ - (1d and 2d) and  $Y^{III}$ -PEG conjugates (3d):**

To a flask containing succinimidylester derivative of PEG **d** (1 equiv), was added dropwise a mixture of  $Ln^{III}$  complex **8** or **9**, or  $Y^{III}$  complex **10**, (3 equiv), and diisopropylethylamine (3 equiv) in anhydrous  $CH_3OH$  (5 mL). The resulting mixture was allowed to stir at ambient temperature under Ar for 24 h. The resulting reaction mixture was concentrated under reduced pressure to obtain a white solid that was dissolved in  $H_2O$  (10 mL) and washed with hexanes (4  $\times$  10 mL). The  $H_2O$  layer was dialyzed in a 1000 Da MWCO dialysis membranes against  $H_2O$  (4 L). The dialysis reservoir was changed at 2–4, 6–8, and 10–14 h. After the last change, dialysis was continued for 7 h. Contents within the dialysis membrane were freeze dried and the resulting solids were washed with  $CH_3CN$  (3  $\times$  5 mL) to yield  $Ln^{III}$  conjugates **1d** and **2d**, and  $Y^{III}$  conjugate **3d**, as white solids. The purity of **1d**, **2d**, and **3d** was verified by aqueous SEC, and the chromatograms are on page S28.

**Conjugate 1d:** 42.6 mg (45%), MALDI- MS: median peak  $[M + H]^+$  calcd for  $GdC_{228}H_{448}N_6O_{112}$ , 5222.87; found 5222.03

**Conjugate 2d:** 44.6 mg (48%), MALDI- MS: median peak  $[M + H]^+$  calcd for  $EuC_{228}H_{448}N_6O_{112}$ , 5217.87; found 5217.01

**Conjugate 3d:** 41.9 mg (44%), MALDI- MS: median peak  $[M + Na]^+$  calcd for  $YC_{228}H_{447}N_6O_{112}Na$ , 5175.84; found 5175.88

## Water-Proton Relaxation Rate Data

### 1a

#### Trial 1

| Concn (mM) | $1/T_1$ ( $s^{-1}$ ) | $T_1$ (s) |
|------------|----------------------|-----------|
| 5.70       | 15.8                 | 0.0633    |
| 2.85       | 7.84                 | 0.128     |
| 1.43       | 4.44                 | 0.225     |
| 0.713      | 2.64                 | 0.379     |
| 0.000      | 0.259                | 3.87      |

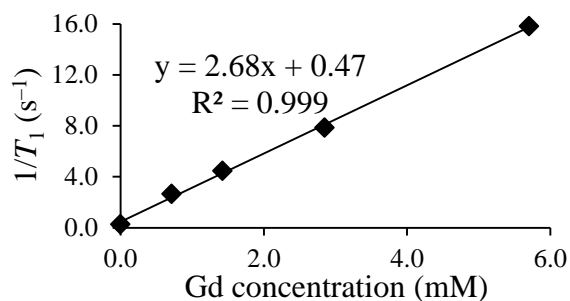

#### Trial 2

| Concn (mM) | $1/T_1$ ( $s^{-1}$ ) | $T_1$ (s) |
|------------|----------------------|-----------|
| 5.70       | 14.5                 | 0.0692    |
| 2.85       | 7.73                 | 0.129     |
| 1.43       | 3.88                 | 0.258     |
| 0.713      | 2.62                 | 0.382     |
| 0.000      | 0.262                | 3.81      |

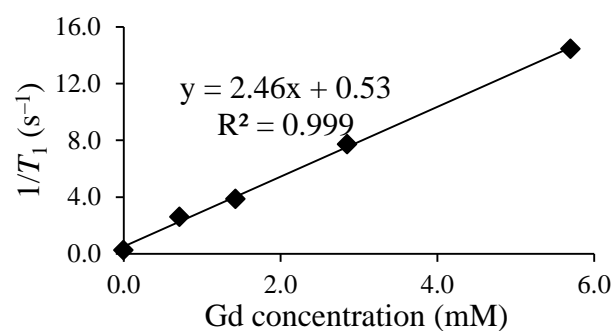

#### Trial 3

| Concn (mM) | $1/T_1$ ( $s^{-1}$ ) | $T_1$ (s) |
|------------|----------------------|-----------|
| 5.70       | 14.5                 | 0.0690    |
| 2.85       | 7.75                 | 0.129     |
| 1.43       | 3.94                 | 0.254     |
| 0.713      | 2.63                 | 0.381     |
| 0.000      | 0.262                | 3.81      |

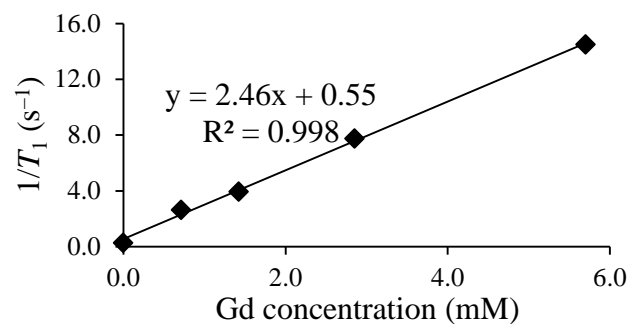

### 1b

#### Trial 1

| Concn (mM) | $1/T_1$ ( $s^{-1}$ ) | $T_1$ (s) |
|------------|----------------------|-----------|
| 7.88       | 33.0                 | 0.0303    |
| 3.94       | 16.5                 | 0.0606    |
| 1.97       | 8.29                 | 0.121     |
| 0.990      | 4.60                 | 0.217     |
| 0.000      | 0.259                | 3.87      |

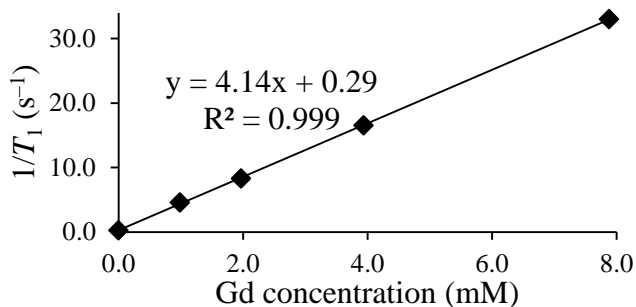

**Trial 2**

| Concn (mM) | $1/T_1$ ( $s^{-1}$ ) | $T_1$ (s) |
|------------|----------------------|-----------|
| 7.88       | 31.4                 | 0.0319    |
| 3.94       | 14.8                 | 0.0675    |
| 1.97       | 8.40                 | 0.119     |
| 0.990      | 4.10                 | 0.244     |
| 0.000      | 0.262                | 3.81      |

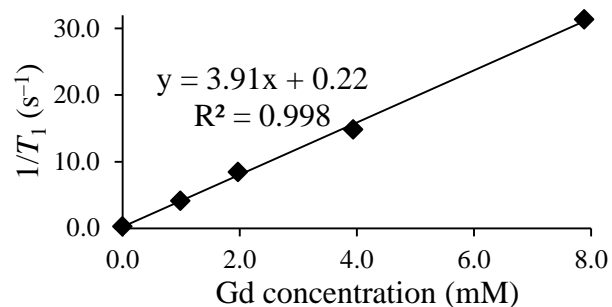**Trial 3**

| Concn (mM) | $1/T_1$ ( $s^{-1}$ ) | $T_1$ (s) |
|------------|----------------------|-----------|
| 7.88       | 30.9                 | 0.0324    |
| 3.94       | 14.8                 | 0.0675    |
| 1.97       | 8.26                 | 0.121     |
| 0.990      | 4.11                 | 0.2436    |
| 0.000      | 0.262                | 3.81      |

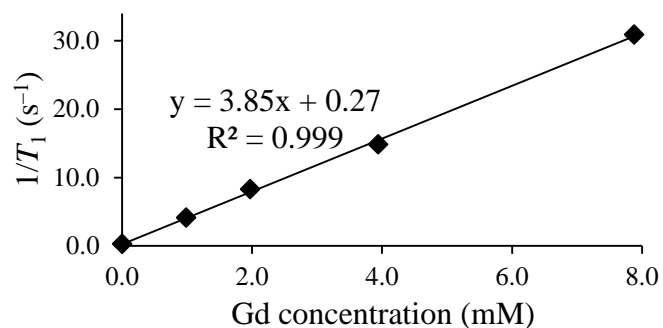**1c****Trial 1**

| Concn (mM) | $1/T_1$ ( $s^{-1}$ ) | $T_1$ (s) |
|------------|----------------------|-----------|
| 1.02       | 5.68                 | 0.176     |
| 0.510      | 3.03                 | 0.330     |
| 0.255      | 1.42                 | 0.704     |
| 0.128      | 0.790                | 1.27      |
| 0.000      | 0.260                | 3.85      |

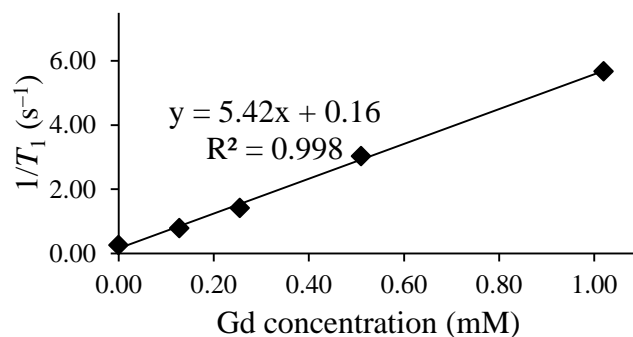**Trial 2**

| Concn (mM) | $1/T_1$ ( $s^{-1}$ ) | $T_1$ (s) |
|------------|----------------------|-----------|
| 1.02       | 5.68                 | 0.176     |
| 0.510      | 3.03                 | 0.330     |
| 0.255      | 1.42                 | 0.704     |
| 0.128      | 0.790                | 1.27      |
| 0.000      | 0.262                | 3.81      |

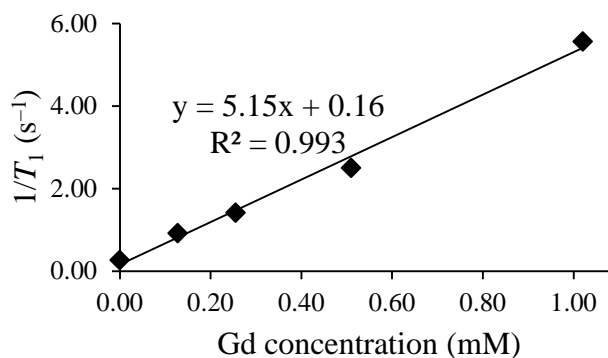

**Trial 3**

| Concn (mM) | $1/T_1$ (s <sup>-1</sup> ) | $T_1$ (s) |
|------------|----------------------------|-----------|
| 1.02       | 5.68                       | 0.176     |
| 0.510      | 3.03                       | 0.330     |
| 0.255      | 1.42                       | 0.704     |
| 0.128      | 0.790                      | 1.27      |
| 0.000      | 0.262                      | 3.81      |

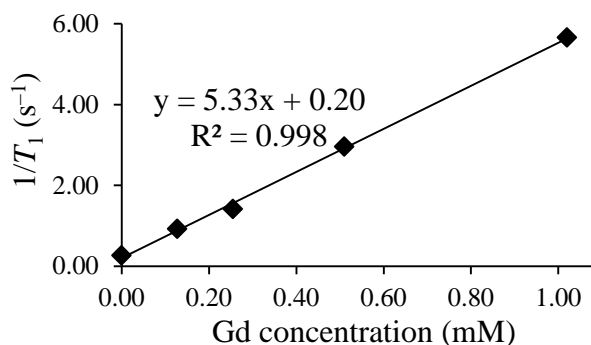**1d****Trial 1**

| Concn (mM) | $1/T_1$ (s <sup>-1</sup> ) | $T_1$ (s) |
|------------|----------------------------|-----------|
| 0.387      | 2.61                       | 0.383     |
| 0.194      | 1.41                       | 0.712     |
| 0.097      | 0.842                      | 1.19      |
| 0.048      | 0.547                      | 1.83      |
| 0.000      | 0.260                      | 3.85      |

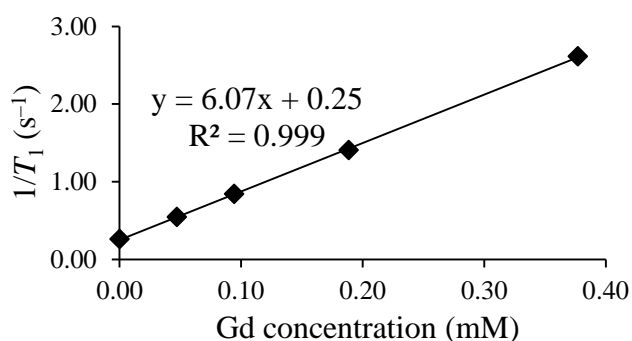**Trial 2**

| Concn (mM) | $1/T_1$ (s <sup>-1</sup> ) | $T_1$ (s) |
|------------|----------------------------|-----------|
| 0.387      | 2.72                       | 0.368     |
| 0.194      | 1.46                       | 0.685     |
| 0.097      | 0.867                      | 1.15      |
| 0.048      | 0.555                      | 1.80      |
| 0.000      | 0.262                      | 3.81      |

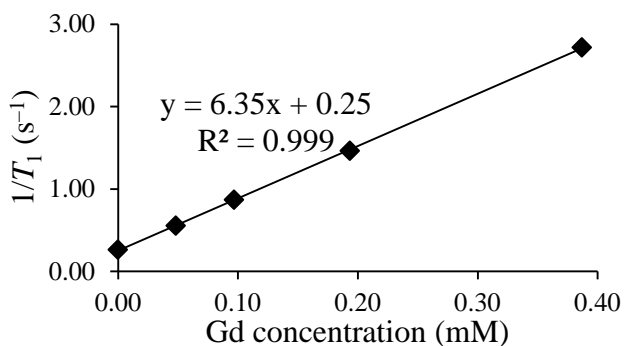**Trial 3**

| Concn (mM) | $1/T_1$ (s <sup>-1</sup> ) | $T_1$ (s) |
|------------|----------------------------|-----------|
| 0.387      | 2.71                       | 0.369     |
| 0.194      | 1.46                       | 0.684     |
| 0.097      | 0.870                      | 1.15      |
| 0.048      | 0.554                      | 1.80      |
| 0.000      | 0.262                      | 3.81      |

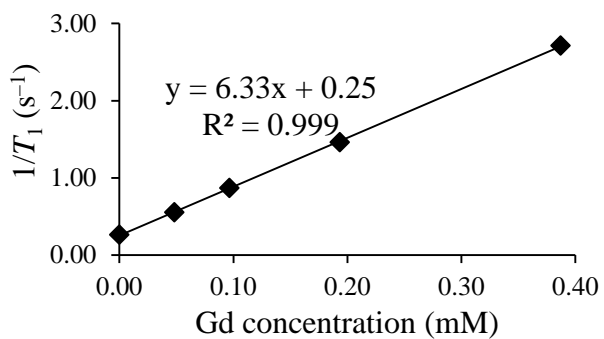

## Variable-Temperature $^{17}\text{O}$ NMR Data

1a

| Temperature ( $^{\circ}\text{C}$ ) | Linewidth at half height (Hz) |       |
|------------------------------------|-------------------------------|-------|
|                                    | 1a                            | 3a    |
| 70                                 | 114.08                        | 28.87 |
| 60                                 | 141.92                        | 32.27 |
| 50                                 | 155.88                        | 37.10 |
| 40                                 | 151.51                        | 42.31 |
| 30                                 | 136.03                        | 50.52 |
| 25                                 | 130.05                        | 58.68 |

⊕ Notes

⊕ Input Data

⊖ Parameters

|         | Value       | Standard Error |
|---------|-------------|----------------|
| T1e298  | 4.38258E-7  | 3.45164E-8     |
| taum298 | 3.7102E-7   | 8.51078E-9     |
| deltaH  | 36345.26499 | 771.22178      |
| deltaE  | 2.5E-11     | 0              |
| q       | 0.9         | 0              |
| Gd      | 0.006       | 0              |

Iterations Performed = 14  
 Total Iterations in Session = 14  
 Fit converged - tolerance criterion satisfied.  
 Some parameter values were fixed.

⊖ Statistics

|                         | B              |
|-------------------------|----------------|
| Number of Points        | 6              |
| Degrees of Freedom      | 3              |
| Reduced Chi-Sqr         | 21.44282       |
| Residual Sum of Squares | 64.32845       |
| Adj. R-Square           | 0.99365        |
| Fit Status              | Succeeded(100) |

Fit Status Code :  
 100 : Fit converged

⊕ Summary

⊕ ANOVA

⊖ Fitted Curves Plot

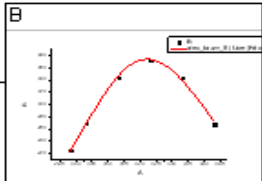

⊕ Residual vs. Independent Plot

**1b**

| Temperature (°C) | Linewidth at half height (Hz) |           |
|------------------|-------------------------------|-----------|
|                  | <b>1b</b>                     | <b>3b</b> |
| 70               | 85.90                         | 30.30     |
| 60               | 102.03                        | 32.84     |
| 50               | 110.20                        | 37.08     |
| 40               | 105.90                        | 42.82     |
| 30               | 97.05                         | 50.93     |
| 20               | 91.20                         | 63.56     |

**Notes**

**Input Data**

**Parameters**

|         | Value       | Standard Error |
|---------|-------------|----------------|
| T1e298  | 6.08495E-8  | 6.79423E-10    |
| taum298 | 6.63992E-7  | 1.11586E-8     |
| deltaH  | 50192.54128 | 558.30736      |
| deltaE  | 2.5E-11     | 0              |
| q       | 0.89        | 0              |
| Gd      | 0.0064      | 0              |

Iterations Performed = 5  
 Total Iterations in Session = 5  
 Fit converged - tolerance criterion satisfied.  
 Some parameter values were fixed.

**Statistics**

|                         | B              |
|-------------------------|----------------|
| Number of Points        | 6              |
| Degrees of Freedom      | 3              |
| Reduced Chi-Sqr         | 3.13945        |
| Residual Sum of Squares | 9.41834        |
| Adj. R-Square           | 0.99888        |
| Fit Status              | Succeeded(100) |

Fit Status Code :  
 100 : Fit converged

**Summary**

**ANOVA**

**Fitted Curves Plot**

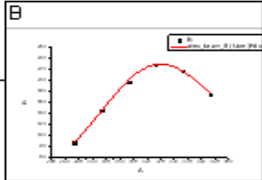

**Residual vs. Indep**

**1c**

| Temperature (°C) | Linewidth at half height (Hz) |       |
|------------------|-------------------------------|-------|
|                  | 1c                            | 3c    |
| 70               | 42.16                         | 29.56 |
| 60               | 48.22                         | 32.88 |
| 50               | 53.56                         | 37.10 |
| 40               | 57.82                         | 43.01 |
| 30               | 62.26                         | 51.34 |
| 20               | 71.26                         | 63.73 |

Notes

Input Data

Parameters

|             | Value       | Standard Error |
|-------------|-------------|----------------|
| T1e298      | 1.15741E-8  | 3.25619E-10    |
| taum298     | 1.20747E-6  | 1.16936E-7     |
| B<br>deltaH | 71378.69844 | 3544.00457     |
| deltaE      | 2.5E-11     | 0              |
| q           | 0.96        | 0              |
| Gd          | 0.004       | 0              |

Iterations Performed = 4  
 Total Iterations in Session = 4  
 Fit converged - tolerance criterion satisfied.  
 Some parameter values were fixed.

Statistics

|                         | B              |
|-------------------------|----------------|
| Number of Points        | 6              |
| Degrees of Freedom      | 3              |
| Reduced Chi-Sqr         | 3.32247        |
| Residual Sum of Squares | 9.96742        |
| Adj. R-Square           | 0.96942        |
| Fit Status              | Succeeded(100) |

Fit Status Code :  
 100 : Fit converged

Summary

ANOVA

Fitted Curves Plot

Residual vs. Indep



**1d**

| Temperature (°C) | Linewidth at half height (Hz) |       |
|------------------|-------------------------------|-------|
|                  | 1d                            | 3d    |
| 70               | 46.59                         | 30.11 |
| 60               | 53.57                         | 34.15 |
| 50               | 59.60                         | 38.95 |
| 40               | 65.80                         | 45.61 |
| 30               | 72.63                         | 54.55 |
| 20               | 79.79                         | 68.18 |

Notes

Input Data

Parameters

|         | Value       | Standard Error |
|---------|-------------|----------------|
| T1e298  | 4.01283E-9  | 3.5135E-11     |
| taum298 | 1.53899E-6  | 6.49975E-8     |
| B       | 90083.64194 | 1536.53152     |
| deltaE  | 2.5E-11     | 0              |
| q       | 0.76        | 0              |
| Gd      | 0.0168      | 0              |

Iterations Performed = 5  
 Total Iterations in Session = 5  
 Fit converged - tolerance criterion satisfied.  
 Some parameter values were fixed.

Statistics

|                         | B              |
|-------------------------|----------------|
| Number of Points        | 6              |
| Degrees of Freedom      | 3              |
| Reduced Chi-Sqr         | 0.76037        |
| Residual Sum of Squares | 2.28111        |
| Adj. R-Square           | 0.99319        |
| Fit Status              | Succeeded(100) |

Fit Status Code :  
 100 : Fit converged

Summary

ANOVA

Fitted Curves Plot

Residual vs. Indep

## Luminescence-Decay Rate Data

| Complex   | Luminescence-decay rates ( $s^{-1}$ ) |                     |                     |                     |                     |                     |
|-----------|---------------------------------------|---------------------|---------------------|---------------------|---------------------|---------------------|
|           | Trial 1                               |                     | Trial 2             |                     | Trial 3             |                     |
|           | in H <sub>2</sub> O                   | in D <sub>2</sub> O | in H <sub>2</sub> O | in D <sub>2</sub> O | in H <sub>2</sub> O | in D <sub>2</sub> O |
| <b>2a</b> | 1.48                                  | 0.419               | 1.46                | 0.428               | 1.48                | 0.428               |
| <b>2b</b> | 1.46                                  | 0.427               | 1.48                | 0.434               | 1.47                | 0.432               |
| <b>2c</b> | 1.52                                  | 0.404               | 1.52                | 0.404               | 1.48                | 0.419               |
| <b>2d</b> | 1.33                                  | 0.422               | 1.32                | 0.422               | 1.39                | 0.421               |

## Electron Paramagnetic Resonance Spectra

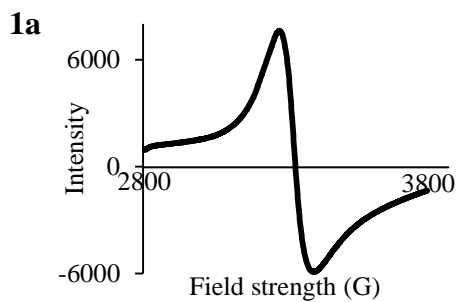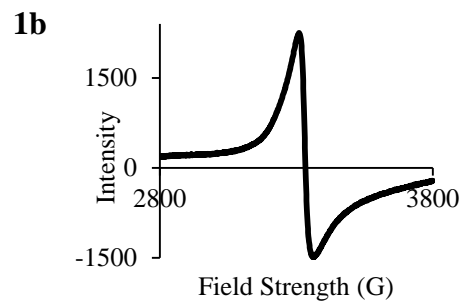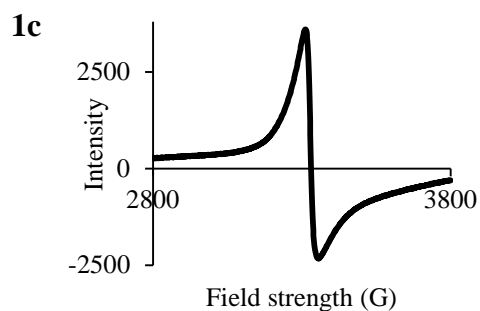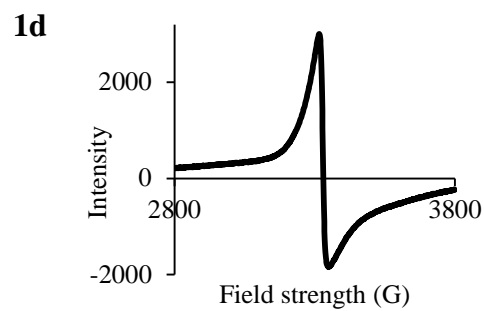

| Complex   | $\Delta H_{pp}$ (G) |
|-----------|---------------------|
| <b>1a</b> | 118                 |
| <b>1b</b> | 53.8                |
| <b>1c</b> | 43.0                |
| <b>1d</b> | 33.2                |

### Estimation of Rotational Correlation Time ( $\tau_R$ )

To obtain an estimation of  $\tau_R$ , we started with equation 1 that relates observed relaxivity,  $r_1^{obs}$ , to inner- and outer-sphere relaxivities,  $r_1^{IS}$  and  $r_1^{OS}$ , respectively, at 1.4 T (60 MHz).<sup>7</sup>

$$r_1^{obs} = r_1^{IS} + r_1^{OS} \quad \text{equation 1}$$

Assuming that complexes **1a–d** behave similarly to small molecular contrast agents,  $r_1^{obs}$  is composed of approximately equal contributions from  $r_1^{IS}$  and  $r_1^{OS}$ .<sup>7</sup> Therefore,  $r_1^{IS}$  can be expressed as half of  $r_1^{obs}$  as shown in equation 2.

$$0.5r_1^{obs} = r_1^{IS} \quad \text{equation 2}$$

$r_1^{IS}$  is related to the number of coordinated water molecules ( $q$ ), longitudinal relaxation time of the coordinated water proton ( $T_{1m}$ ), and residence lifetime of the coordinated water molecule in the inner-sphere ( $\tau_m$ , reciprocal of water-exchange rate,  $k_{ex}$ ) as expressed in equation 3.<sup>7</sup>

$$r_1^{IS} = \frac{q}{55,500} \left[ \frac{1}{T_{1m} + \tau_m} \right] \quad \text{equation 3}$$

Equations 2 and 3 can be combined to obtain equation 4, which enables the calculation of  $T_{1m}$  by substituting  $r_1^{obs}$ ,  $\tau_m$ , and  $q$  with values obtained experimentally for complexes **1a–d** ( $r_1^{obs}$  and  $\tau_m$ ) and **2a–d** ( $q$ ).

$$T_{1m} = \frac{q}{27,750r_1^{obs}} - \tau_m \quad \text{equation 4}$$

$T_{1m}$  is composed of a dipole–dipole contribution ( $DD$ ) and a scalar ( $SC$ ) contribution to longitudinal proton relaxation as shown in equation 5.<sup>7</sup>

$$\frac{1}{T_{1m}} = \frac{1}{T_1^{DD}} + \frac{1}{T_1^{SC}} \quad \text{equation 5}$$

The scalar contribution to overall longitudinal proton relaxation is negligible at field strengths greater than 10 MHz.<sup>7</sup> Therefore, at field strengths above 10 MHz, the longitudinal proton relaxation becomes equal to the *DD* contribution that can be expressed as shown in equation 6.<sup>7</sup>

$$\frac{1}{T_{1m}} = \frac{1}{T_1^{DD}} = \frac{2}{15} \left( \frac{\gamma_I^2 g^2 \mu_B^2}{r_{GdH}^6} \right) S(S+1) \left( \frac{\mu_0}{4\pi} \right)^2 \left( 7 \frac{\tau_{C2}}{1 + \omega_S^2 \tau_{C2}^2} + 3 \frac{\tau_{C1}}{1 + \omega_I^2 \tau_{C1}^2} \right) \quad \text{equation 6}$$

$\gamma_I$ , nuclear gyromagnetic ratio =  $2.67 \times 10^8 \text{ s}^{-1} \text{ T}^{-1}$

$g$ , electron g-factor obtained for complexes **1a–d** from EPR spectra

$\mu_B$ , Bohr magneton =  $9.274 \times 10^{-24} \text{ J T}^{-1}$

$\mu_0$ , vacuum permeability =  $4\pi \times 10^{-7} \text{ T mA}^{-1}$

$r_{GdH}$ , electron spin-proton distance =  $3.1 \times 10^{-10} \text{ m}$  (from reference 7 for DOTA-based  $\text{Gd}^{\text{III}}$ -containing complexes)

$S$ , electron spin for Gd = 3.5

$$\omega_S = \gamma_S B$$

$$\omega_I = \gamma_I B$$

$\gamma_S$ , electron gyromagnetic ratio =  $1.76 \times 10^{11} \text{ s}^{-1} \text{ T}^{-1}$

$\omega_S$  and  $\omega_I$  are the electron and nuclear Larmor frequencies, respectively, at magnetic field strength  $B$  (1.4 T).

$$\frac{1}{\tau_{C2}} = \frac{1}{\tau_R} + \frac{1}{\tau_m} + \frac{1}{T_{2e}} \quad \text{equation 7}$$

$$\frac{1}{\tau_{C1}} = \frac{1}{\tau_R} + \frac{1}{\tau_m} + \frac{1}{T_{1e}} \quad \text{equation 8}$$

$T_{1e}$  and  $T_{2e}$  are the longitudinal and transverse electronic relaxation times, respectively.  $T_{1e}$  (obtained from the fitting of  $^{17}\text{O}$  NMR data) and  $T_{2e}$  (obtained from EPR spectra) for complexes **1a–d** were used in equations 7 and 8 that were combined with equation 6 to solve for  $\tau_R$  for complexes **1a–d**.

| Complex   | $T_{1m} \times 10^{-6}$ (s) | $\tau_R \times 10^{-12}$ (s) |
|-----------|-----------------------------|------------------------------|
| <b>1a</b> | 13                          | 46                           |
| <b>1b</b> | 2.9                         | 79                           |
| <b>1c</b> | 5.3                         | 110                          |
| <b>1d</b> | 7.4                         | 220                          |

### Estimation of Relaxivity, $r_1^{obs}$ , Based on $\tau_R$

Estimated relaxivity values for complex **1a** were obtained using  $\tau_R$  values from complexes **1a–d**, and  $\tau_m$  and  $q$  values from complex **1a**:  $\tau_m = 3.7 \times 10^{-7}$  s and  $q = 0.9$ .  $\tau_{C1}$  and  $\tau_{C2}$  were calculated by substituting  $\tau_m$ ,  $T_{1e}$ , and  $T_{2e}$  obtained for **1a** and  $\tau_R$  from **1a–d** into equations 7 and 8 (page S20). The calculated  $\tau_{C1}$  and  $\tau_{C2}$  values together with other constants were used to calculate values for  $T_{1m}$  using equation 6 (page S20), and the calculated  $T_{1m}$  values and fixed  $\tau_m$  and  $q$  values (from **1a**) were substituted in equation 3 (page S19) to obtain  $r_1^{IS}$  values that were used in equation 2 (page S19) to obtain the estimated relaxivity values for **1a** based on changes in  $\tau_R$  associated with complexes **1a–d**.

| Complex   | Observed $r_1$ (mM <sup>-1</sup> s <sup>-1</sup> ) | Complex                                | Estimated $r_1$ (mM <sup>-1</sup> s <sup>-1</sup> ) |
|-----------|----------------------------------------------------|----------------------------------------|-----------------------------------------------------|
| <b>1a</b> | 2.5                                                | <b>1a</b>                              | 2.5                                                 |
| <b>1b</b> | 4.0                                                | <b>1a</b> with $\tau_R$ from <b>1b</b> | 4.2                                                 |
| <b>1c</b> | 5.3                                                | <b>1a</b> with $\tau_R$ from <b>1c</b> | 5.7                                                 |
| <b>1d</b> | 6.3                                                | <b>1a</b> with $\tau_R$ from <b>1d</b> | 11                                                  |

## References

1. W. C. Still, M. Kahn and A. Mitra, *J. Org. Chem.*, 1978, **43**, 2923.
2. A.-M. Fanning, S. E. Plush and T. Gunnlaugsson, *Chem. Commun.*, 2006, 3791.
3. J. Garcia, J. Neelavalli, E. M. Haacke and M. J. Allen, *Chem. Commun.*, 2011, **47**, 12858.
4. R. M. Supkowski and W. D. Horrocks, Jr., *Inorg. Chim. Acta*, 2002, **340**, 44.
5. D. H. Powell, O. M. N. Dhubhghaill, D. Pubanz, L. Helm, Y. S. Lebedev, W. Schlaepfer and A. E. Merbach, *J. Am. Chem. Soc.*, 1996, **118**, 9333.
6. A. Dadabhoy, S. Faulkner and P. G. Sammes, *J. Chem. Soc., Perkin Trans. 2*, 2002, 348.
7. P. Caravan, J. J. Ellison, T. J. McMurry and R. B. Lauffer, *Chem. Rev.*, 1999, **99**, 2293.

# High Performance Liquid Chromatograms

## SEC Chromatograms for Complexes 8–10

8

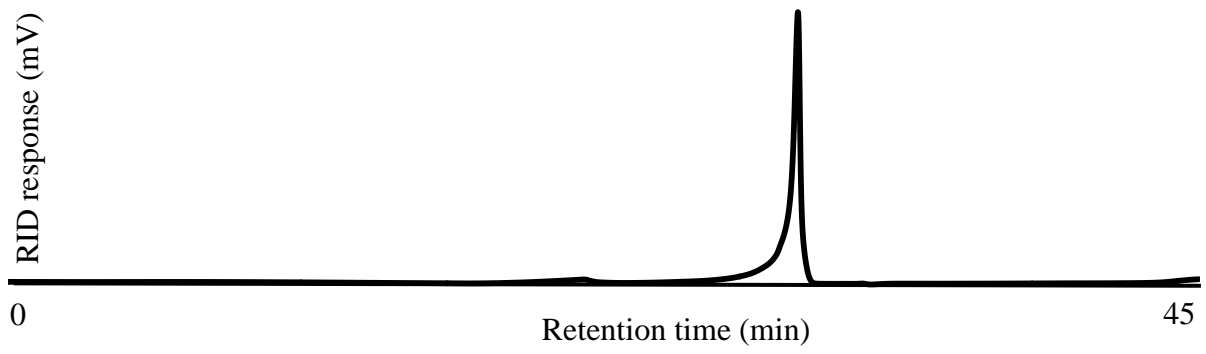

9

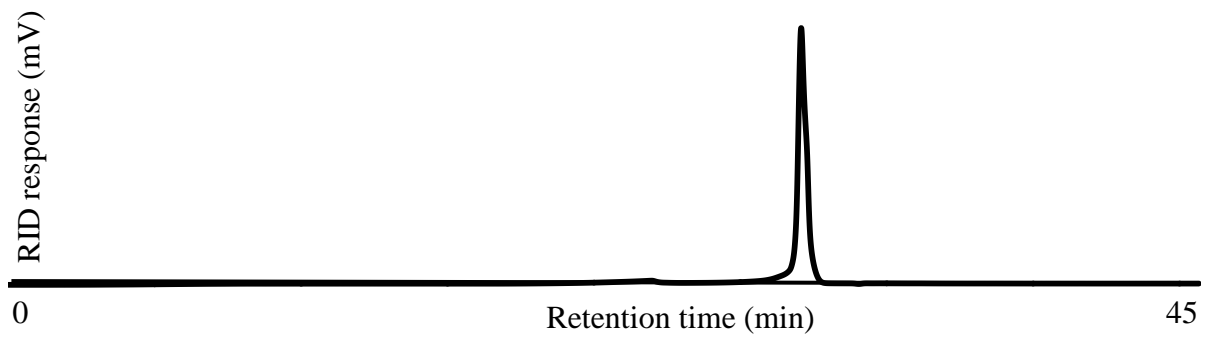

10

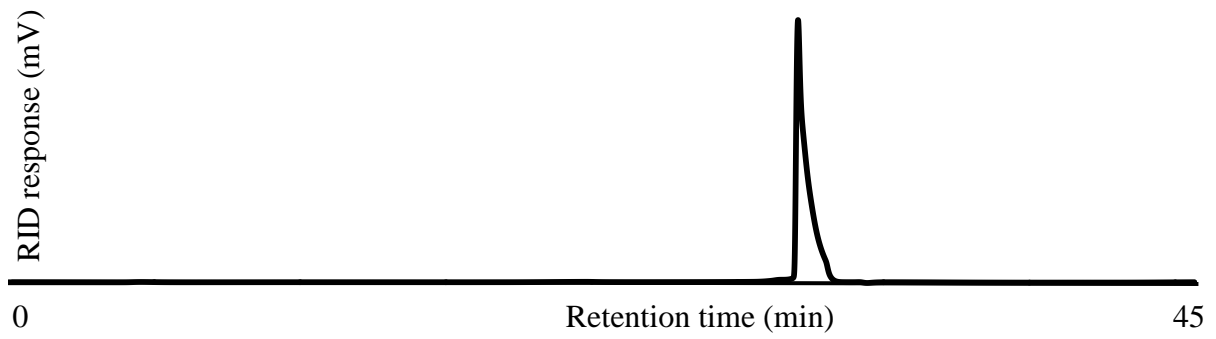



# HPLC Chromatograms for complexes 1a-c, 2a-c, and 3a-c

**1a**

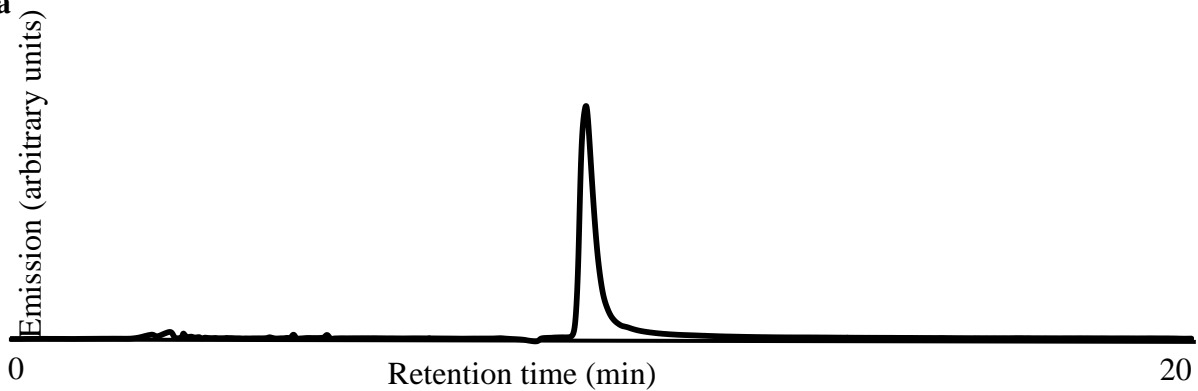

**2a**

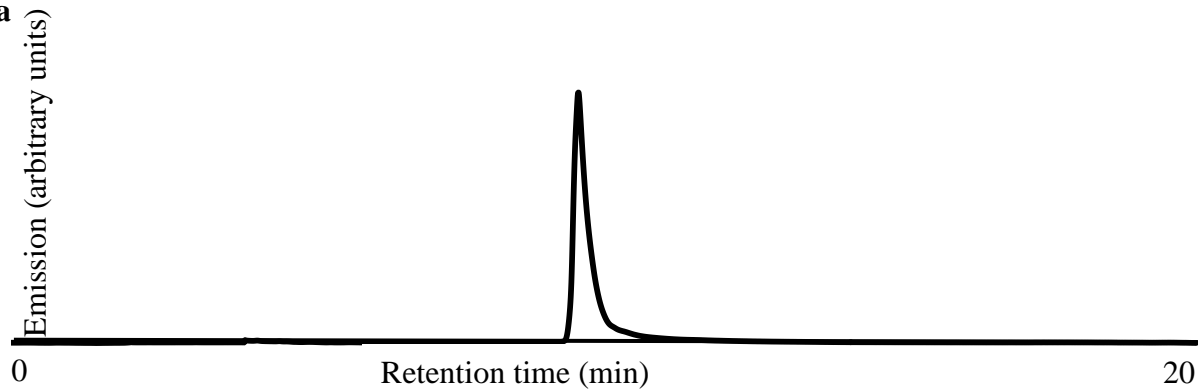

**3a**

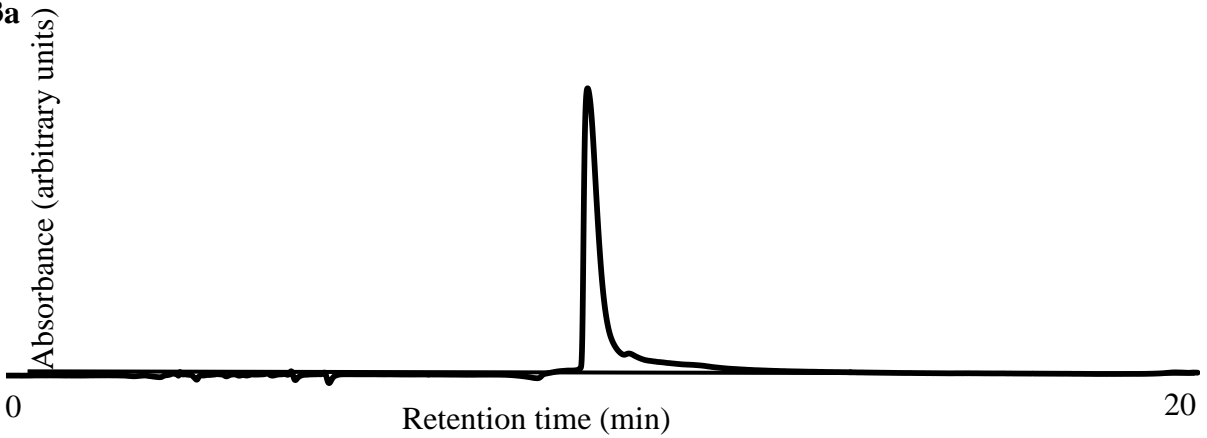

**1b**

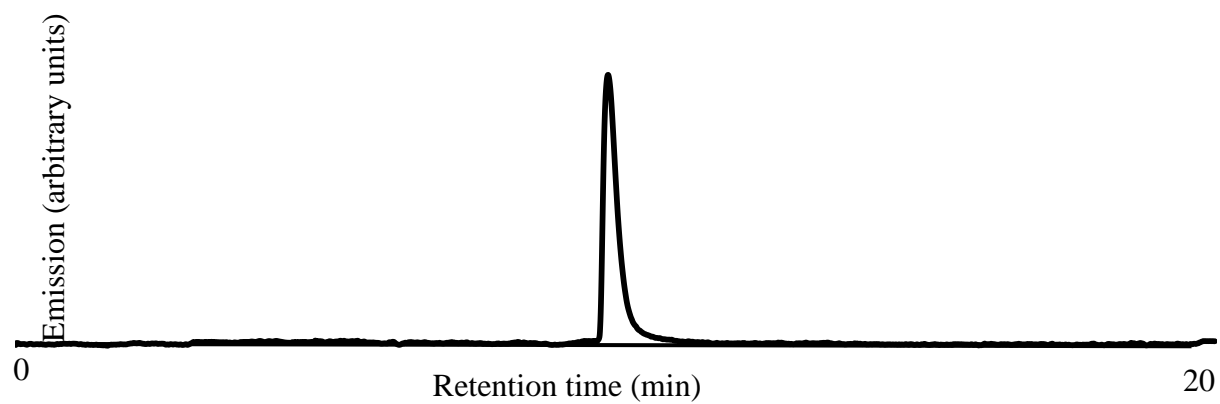

**2b**

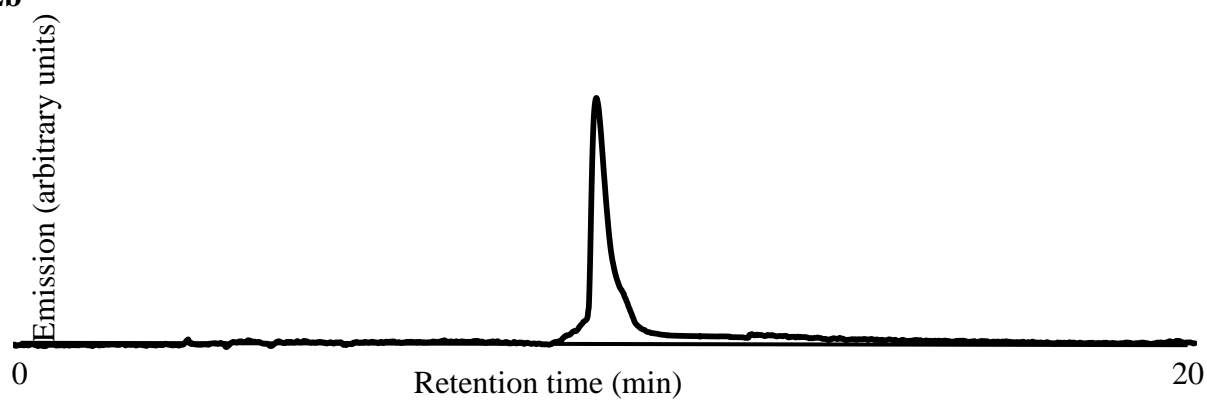

**3b**

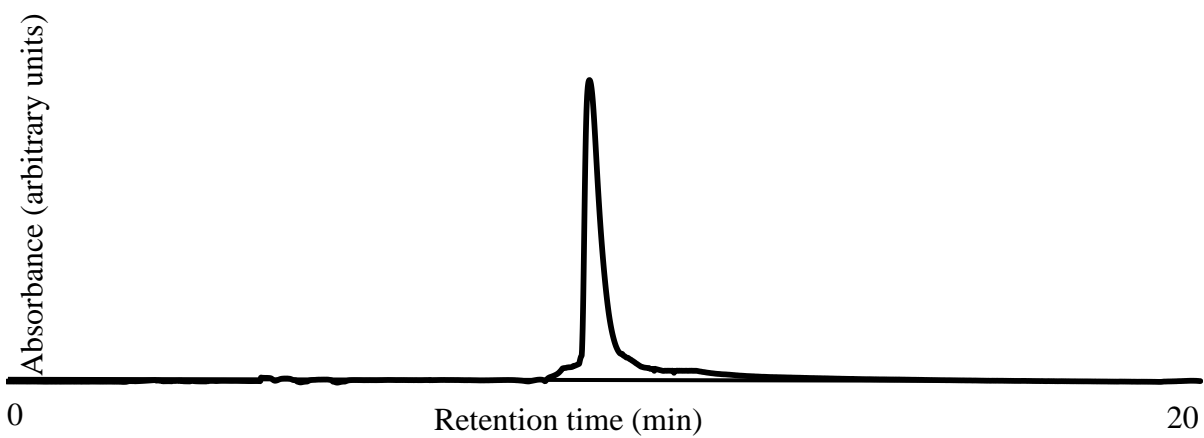

**1c**

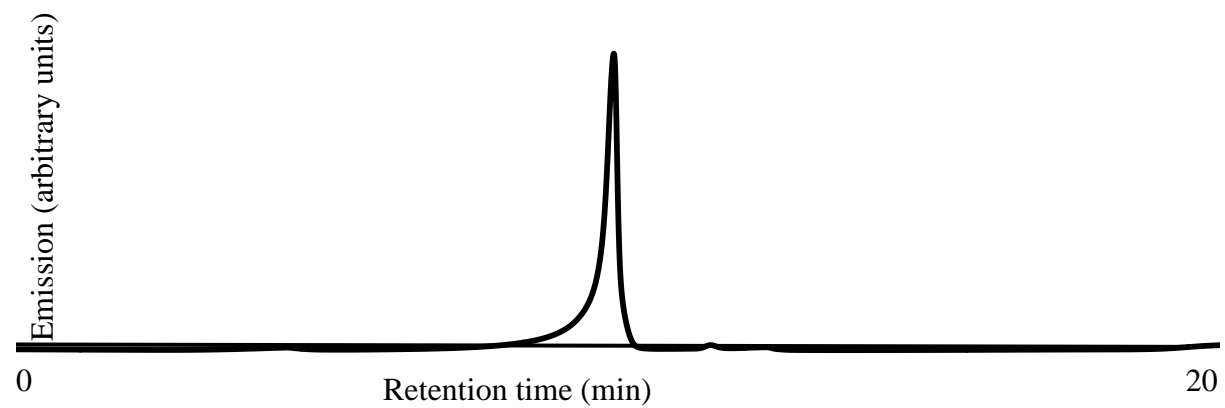

**2c**

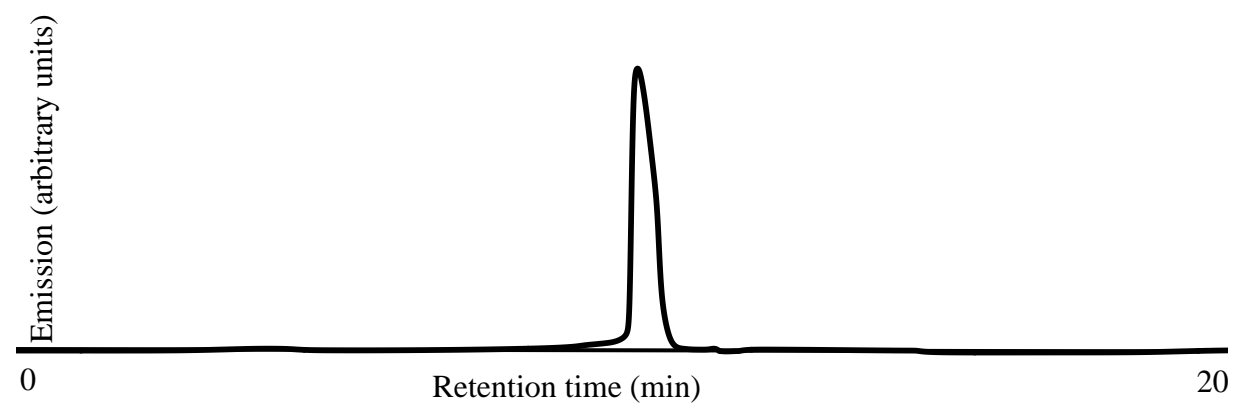

**3c**

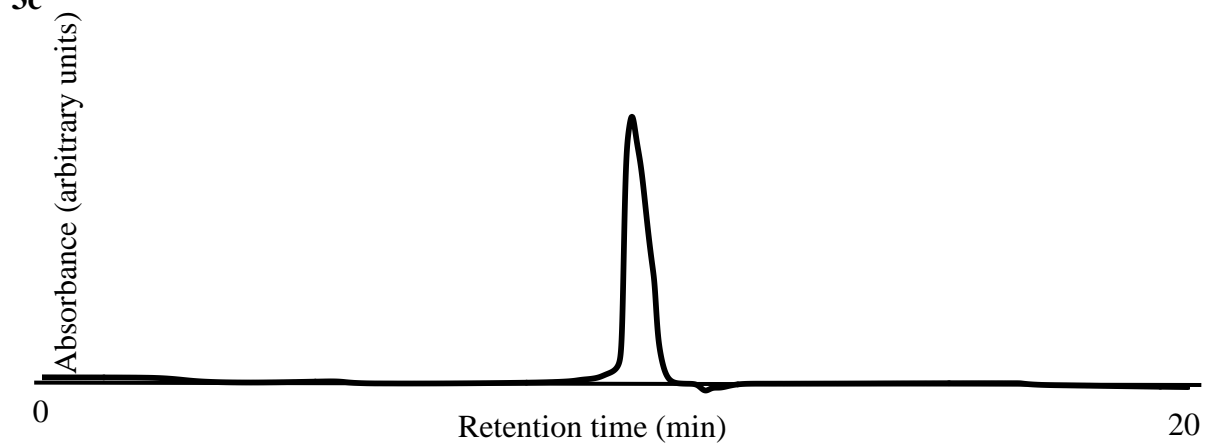

## SEC for complexes 1d, 2d, and 3d

**1d**

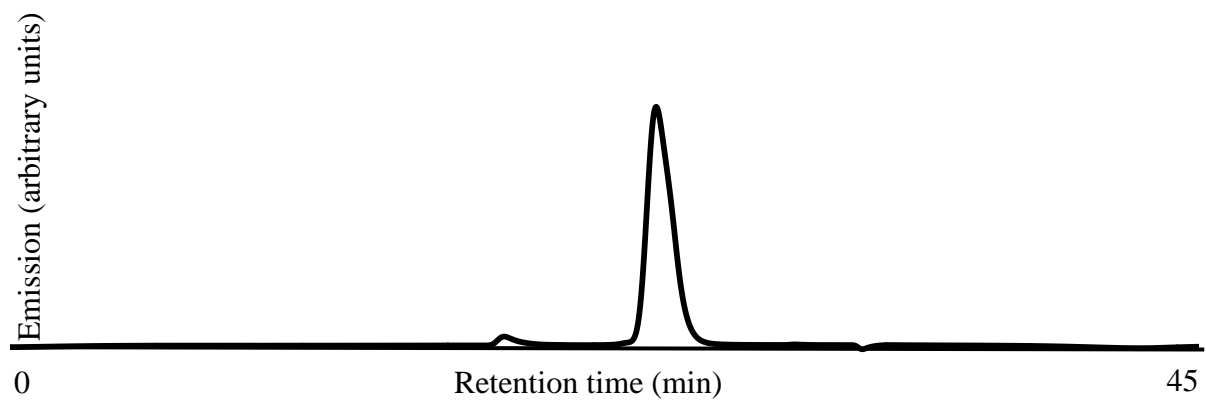

**2d**

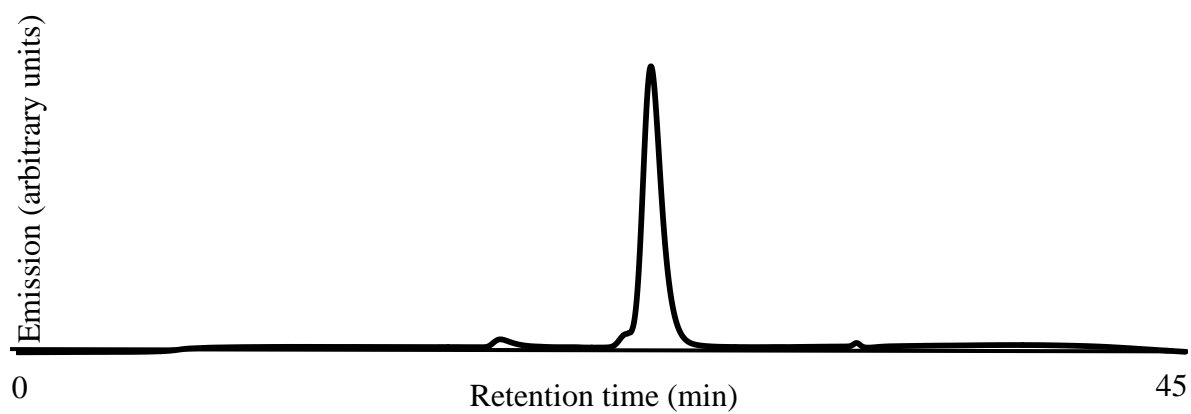

**3d**

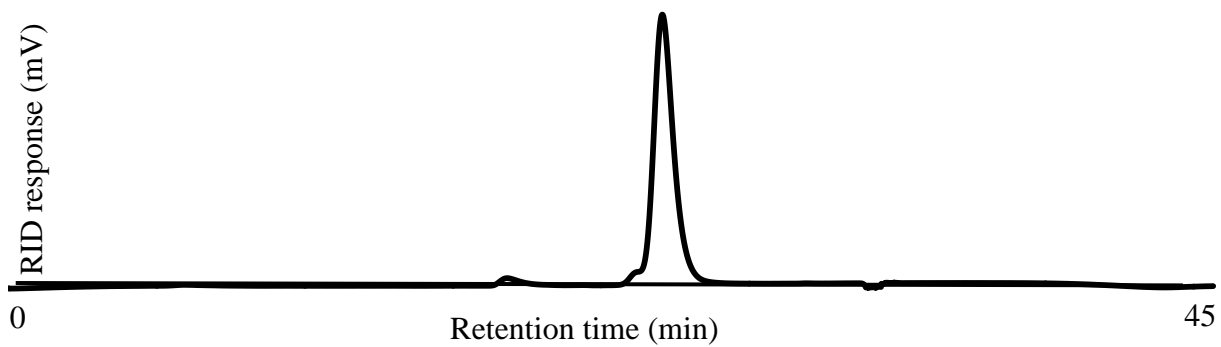

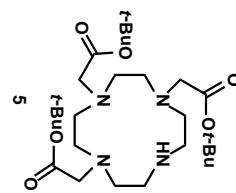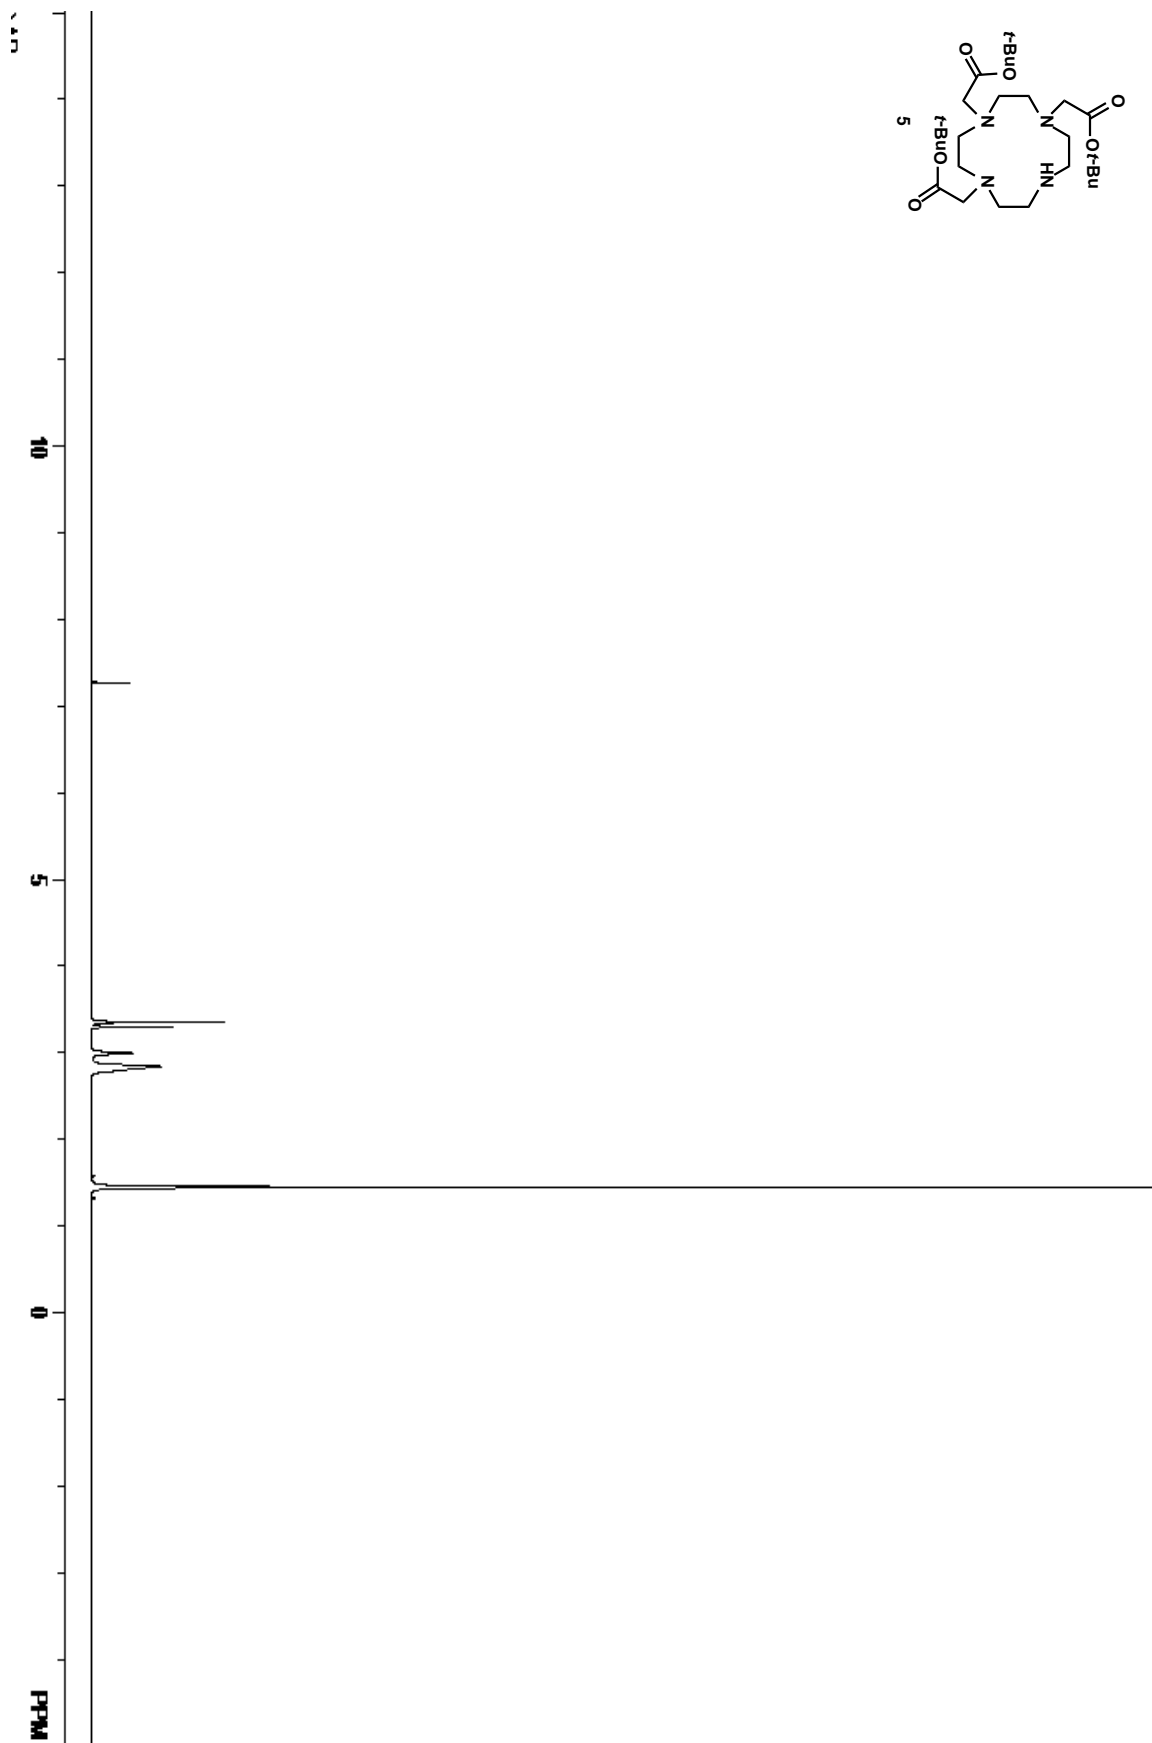

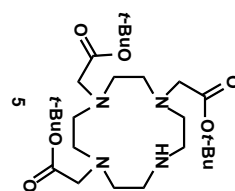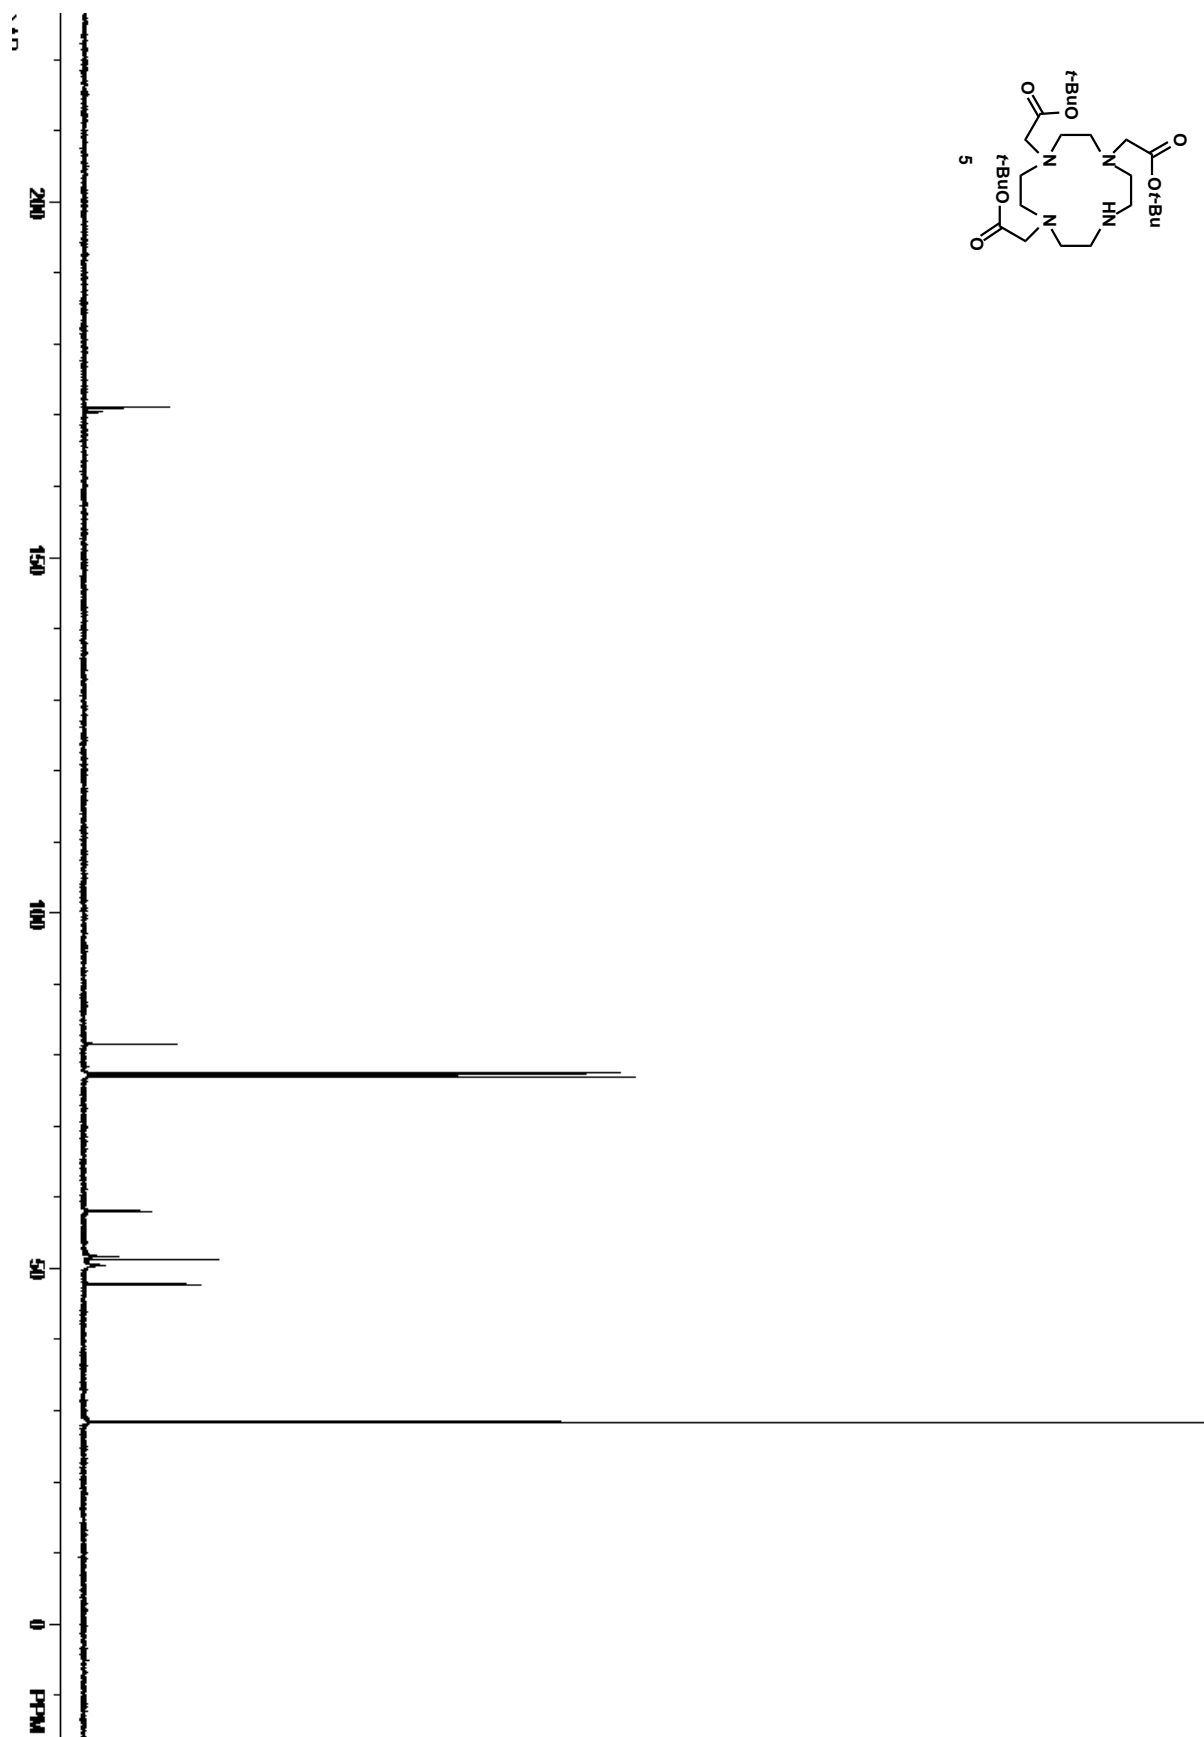

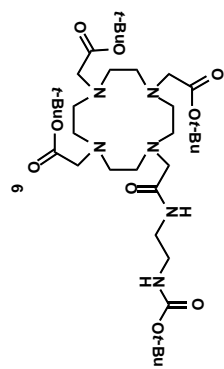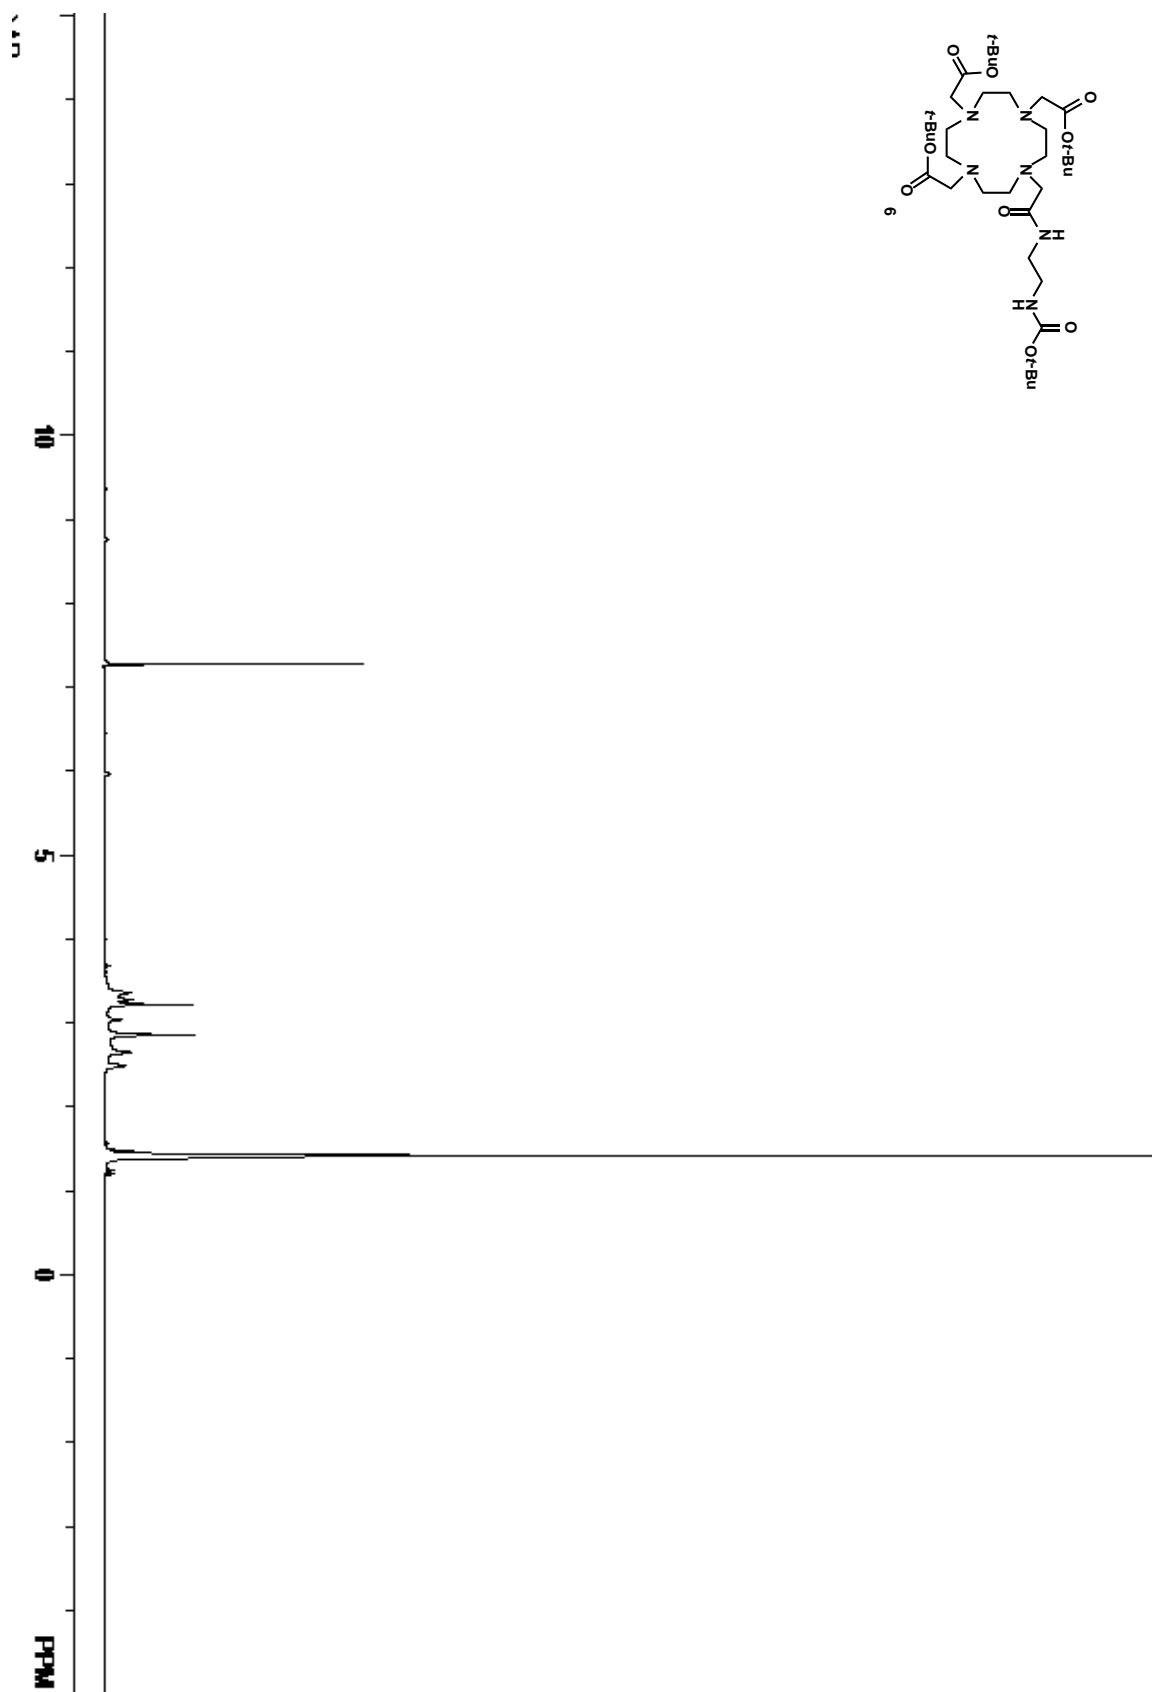

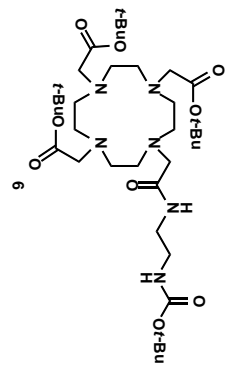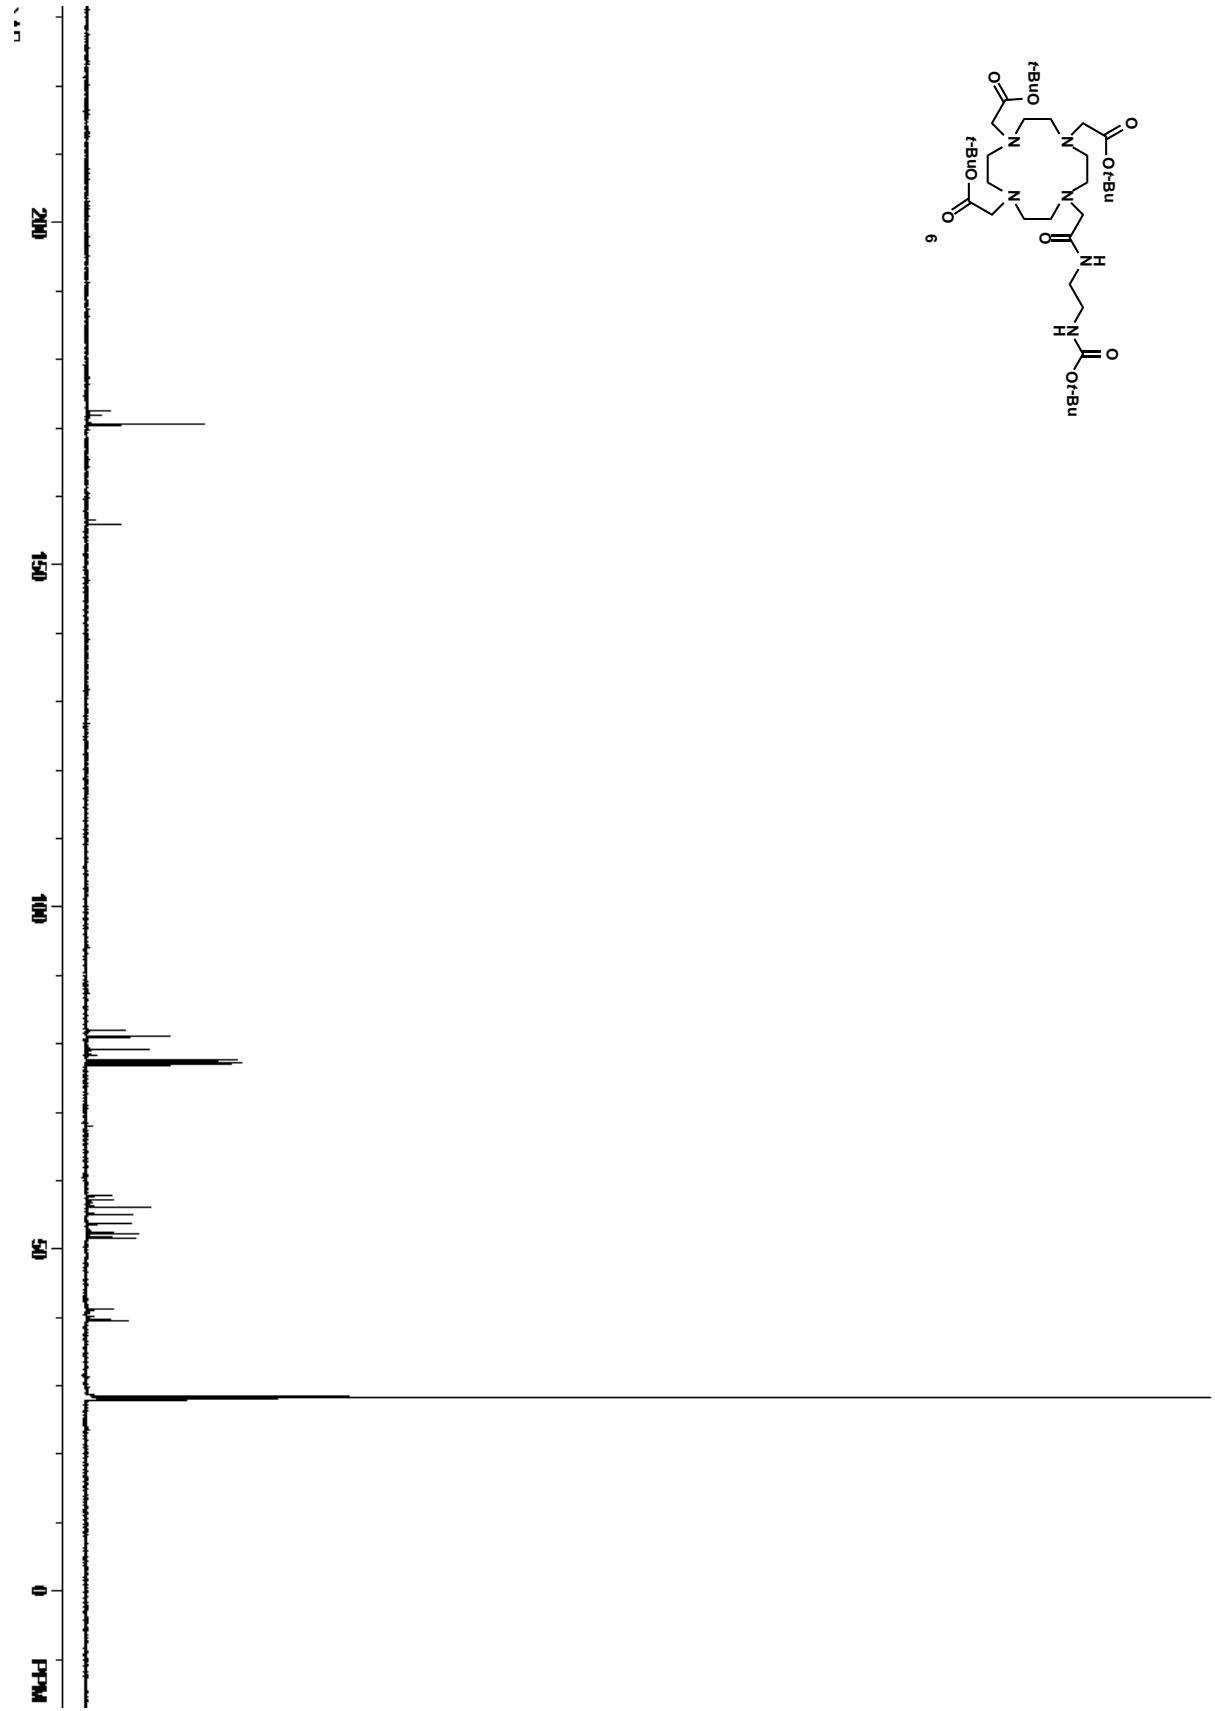



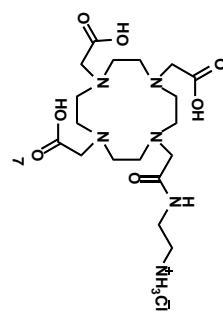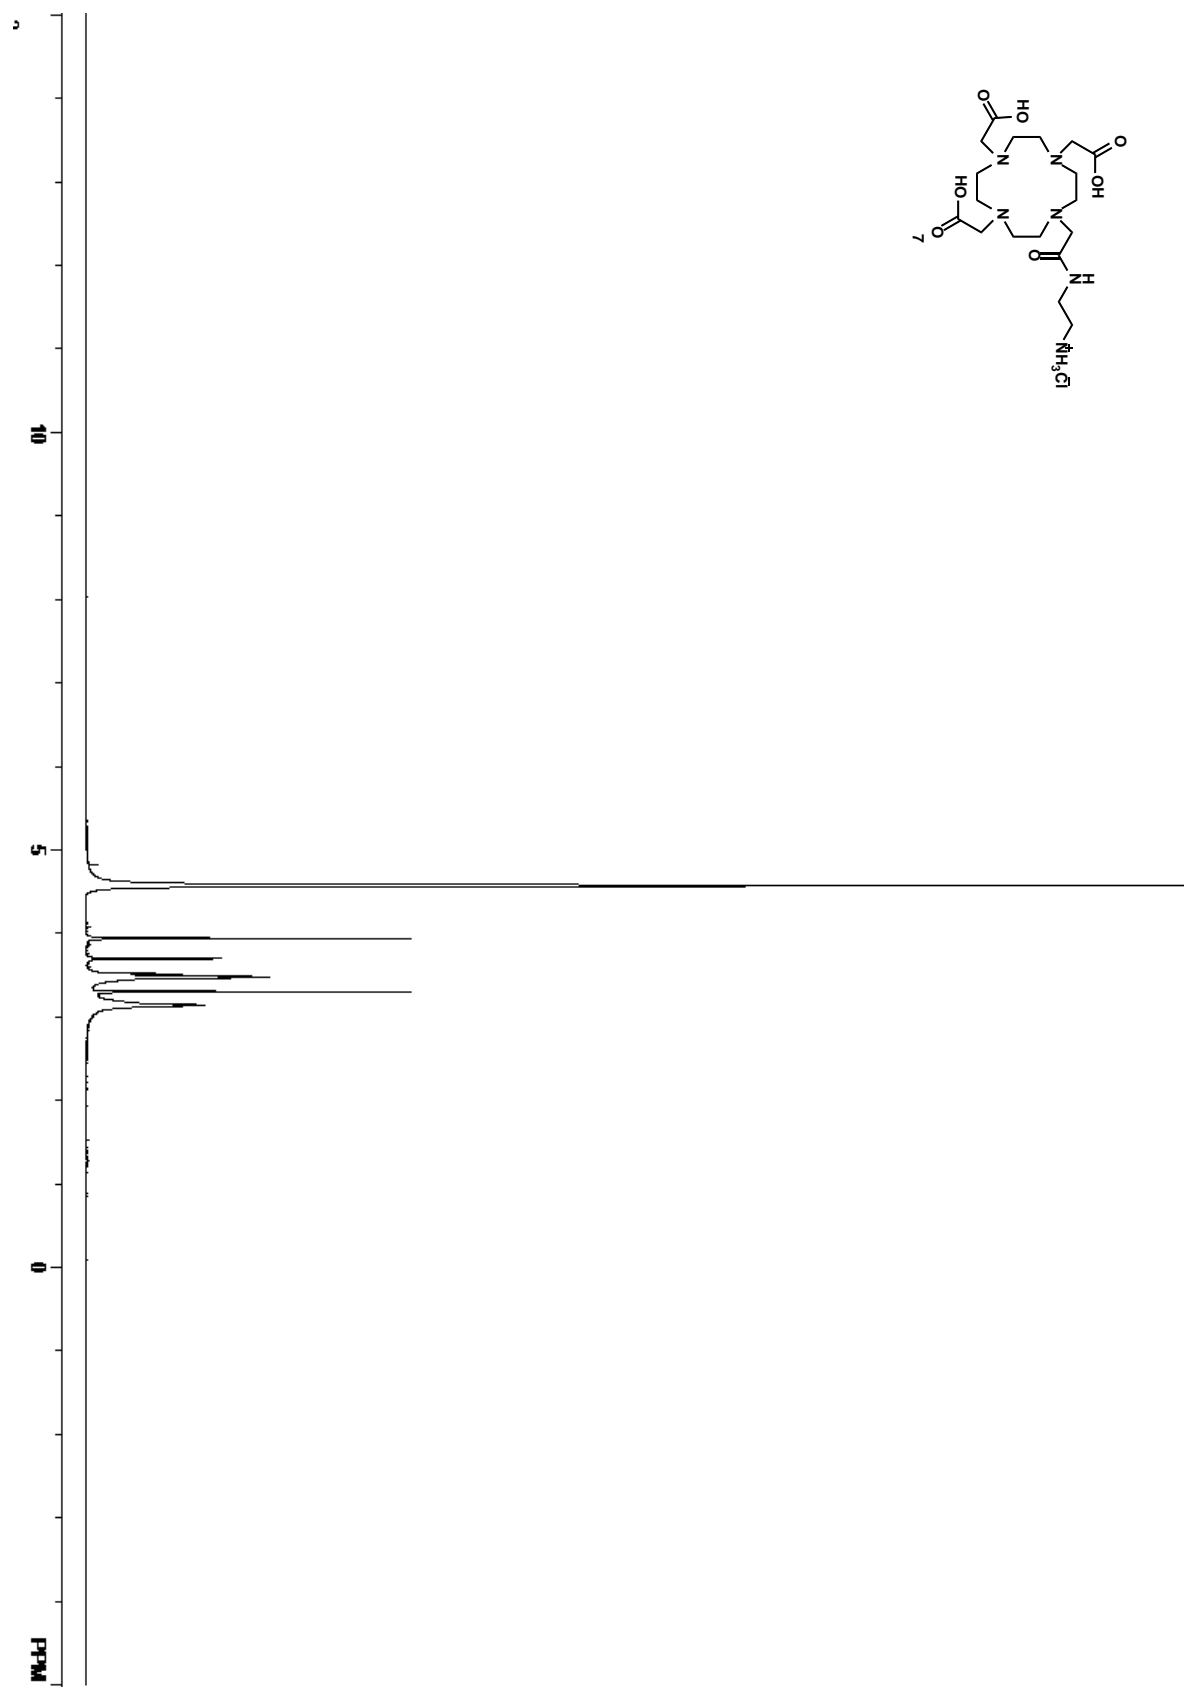

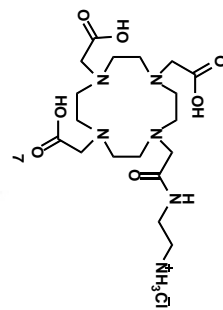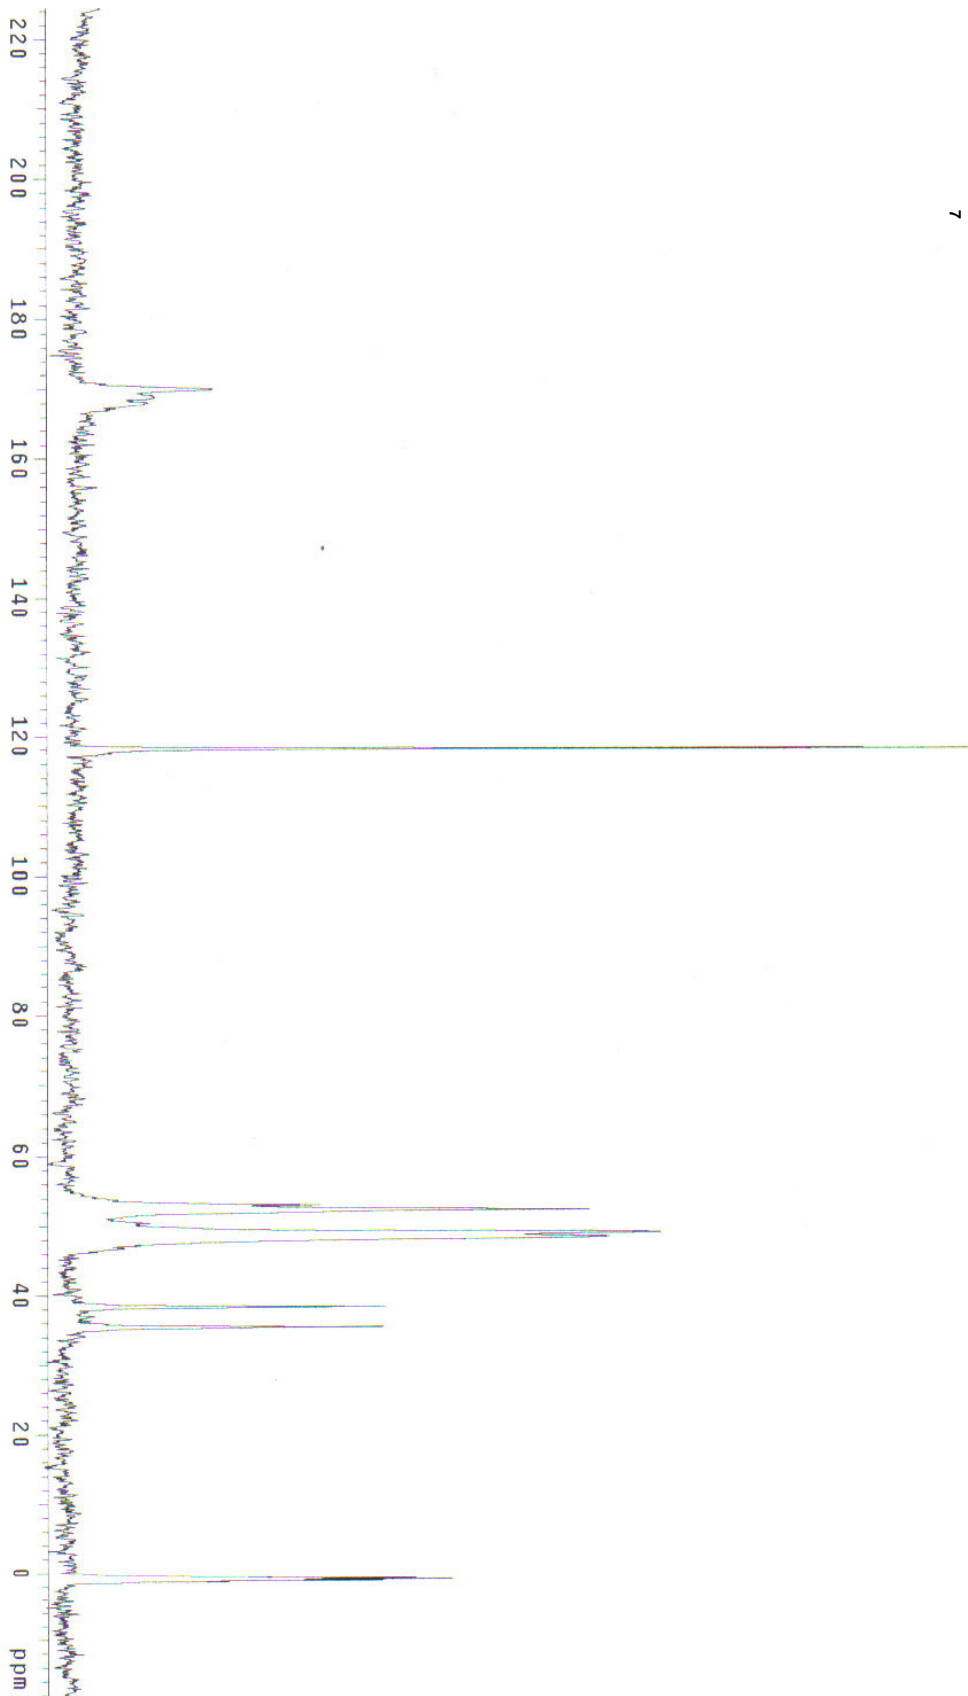

Supplement: NIHMS444011-supplement-Supporting_Information.pdf [file NIHMS444011-supplement-Supporting_Information.pdf]
